# Supplementary material for: A one-pot synthesis of 7-phenylindolo[3,2-a]carbazoles from indoles and β-nitrostyrenes, via an unprecedented reaction sequence
Source: Royal Society of Chemistry journal article supplement (doi:10.1039/c1ob06108a), 2011-01-01

**Manuscript title: A one-pot synthesis of 7-phenylindolo[3,2-*a*]carbazoles from indoles and  $\beta$ -nitrostyrenes, *via* an unprecedented reaction sequence.**

**Authors:** Grégory Dupeyre,<sup>a</sup> Pascale Lemoine,<sup>b</sup> Nabila Ainseba,<sup>a</sup> Sylvie Michel<sup>a</sup> and Xavier Cachet\*<sup>a</sup>

**Contents** (S1 to S20 are the page numbers)

S1 – Title, authors and description of Supporting information content.

S2 - <sup>1</sup>H and <sup>13</sup>C NMR spectra of compound **6a**

S3 - COSY and NOESY spectra of compound **6a**

S4 - <sup>1</sup>H and <sup>13</sup>C NMR spectra of compound **6b**

S5 - <sup>1</sup>H and <sup>13</sup>C NMR spectra of compound **6c**

S6 - <sup>1</sup>H and <sup>13</sup>C NMR spectra of compound **6d**

S7 - <sup>1</sup>H and <sup>13</sup>C NMR spectra of compound **6e**

S8 - <sup>1</sup>H and <sup>13</sup>C NMR spectra of compound **6f**

S9 - <sup>1</sup>H and <sup>13</sup>C NMR spectra of compound **6g**

S10 - <sup>1</sup>H and <sup>13</sup>C NMR spectra of compound **6h**

S11 - <sup>1</sup>H and <sup>13</sup>C NMR spectra of compound **6i**

S12 - <sup>1</sup>H and <sup>13</sup>C NMR spectra of compound **6j**

S13 - <sup>1</sup>H and <sup>13</sup>C NMR spectra of compound **6k**

S14 - <sup>1</sup>H and <sup>13</sup>C NMR spectra of compound **10**

S15 - <sup>1</sup>H and <sup>13</sup>C NMR spectra of compound **5**

S16 - <sup>1</sup>H and <sup>13</sup>C NMR spectra of compound **12**

S17 - HMQC and HMBC spectra of compound **12**

S18 - <sup>1</sup>H and <sup>13</sup>C NMR spectra of compound **7**

S19 - <sup>1</sup>H and <sup>13</sup>C NMR spectra of compound **11**

S20 - <sup>1</sup>H and <sup>13</sup>C NMR spectra of **2-Amino-4,5-dimethoxybenzoic acid**

### $^1\text{H}$ and $^{13}\text{C}$ NMR spectra of compound **6a**

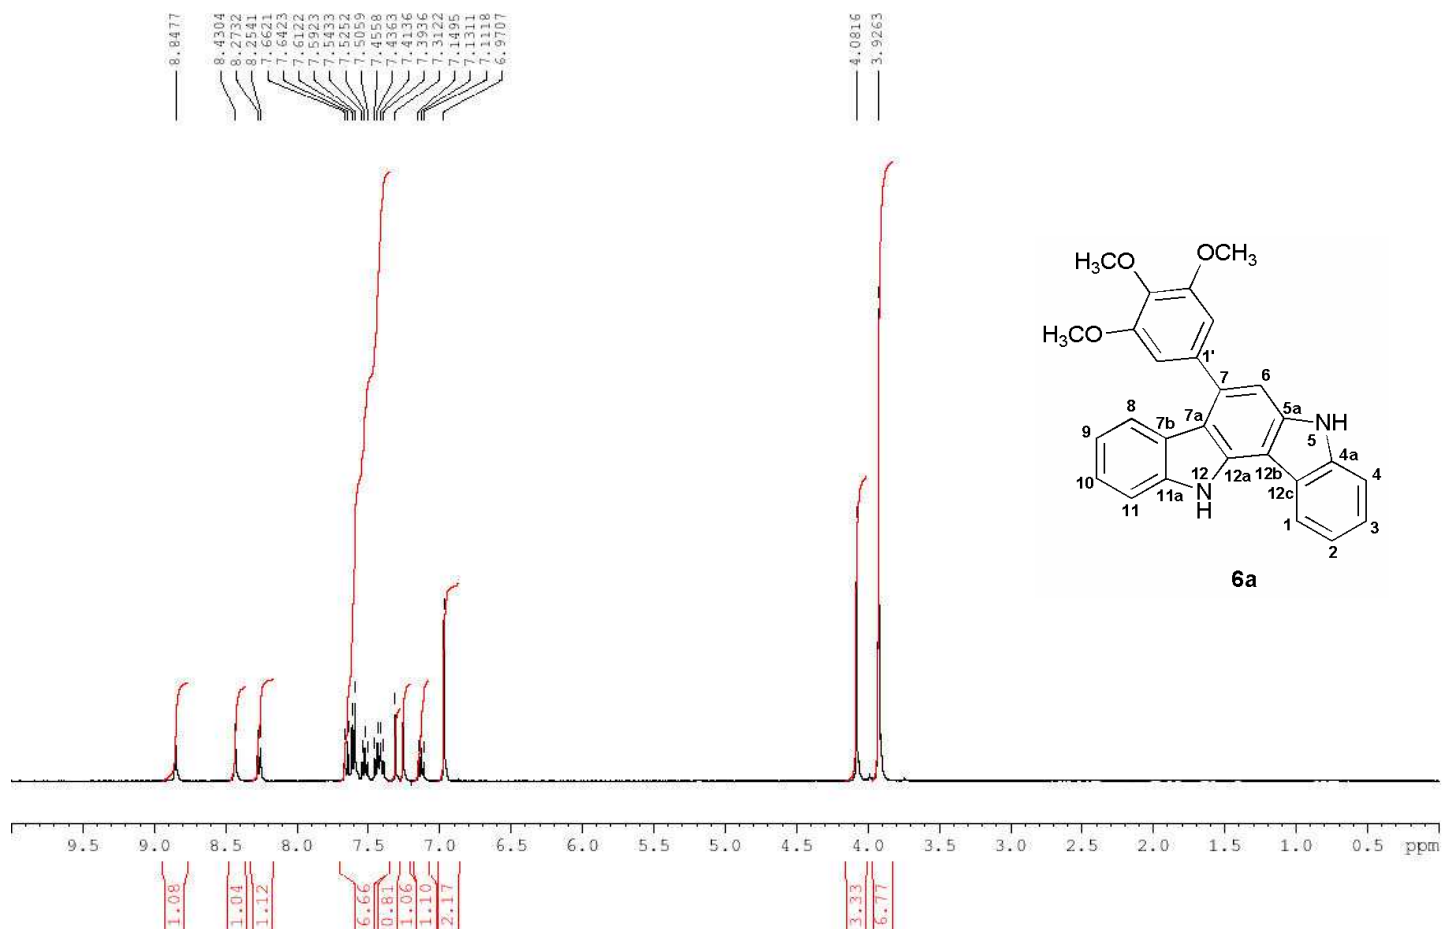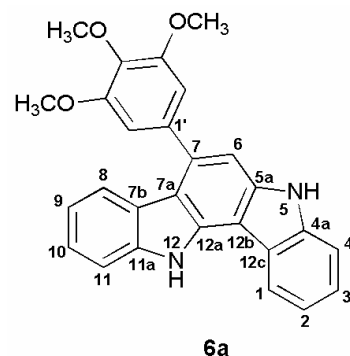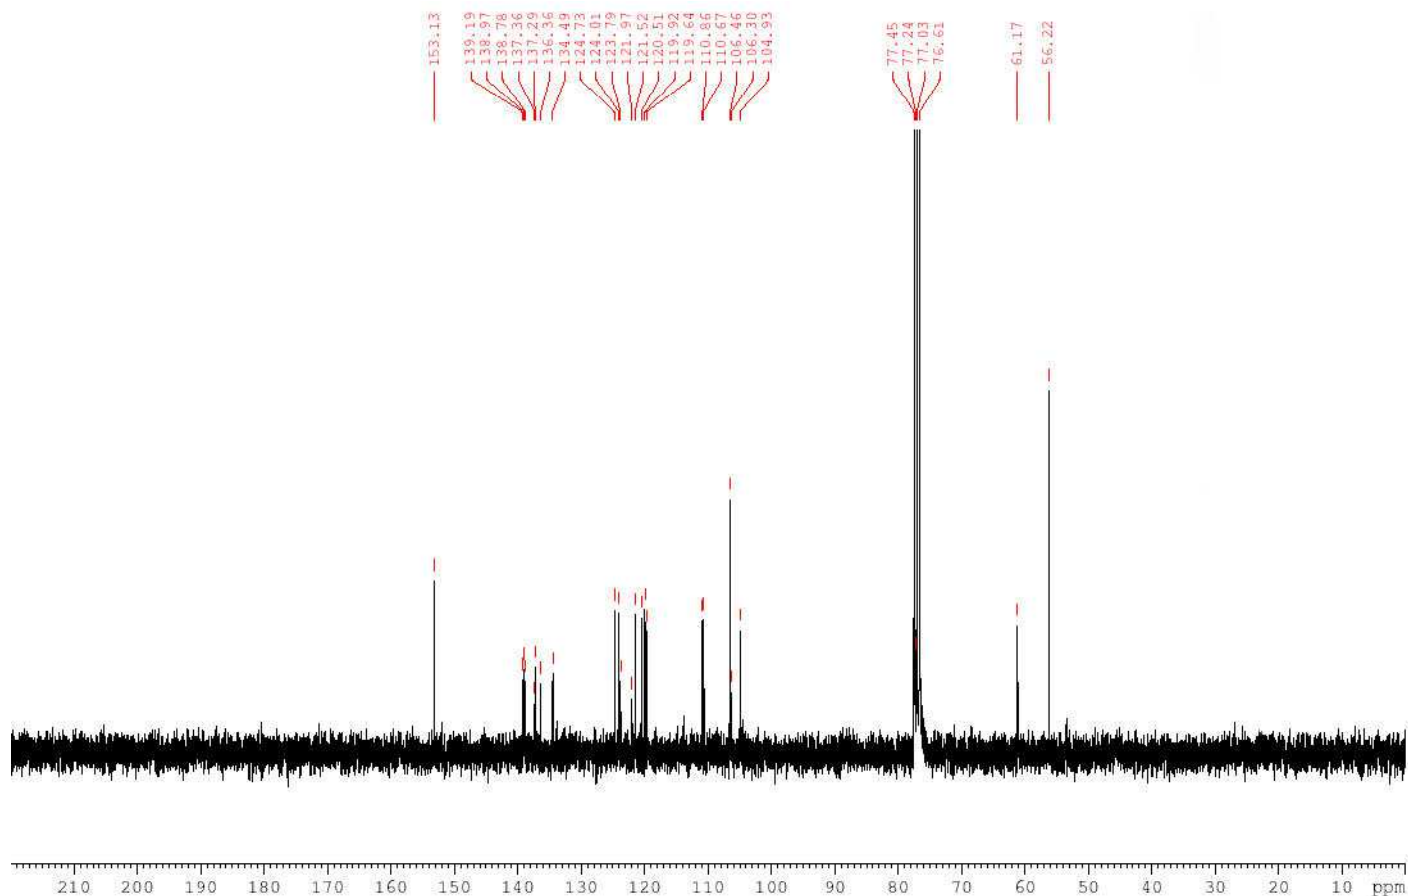

### COSY and NOESY spectra of compound **6a**

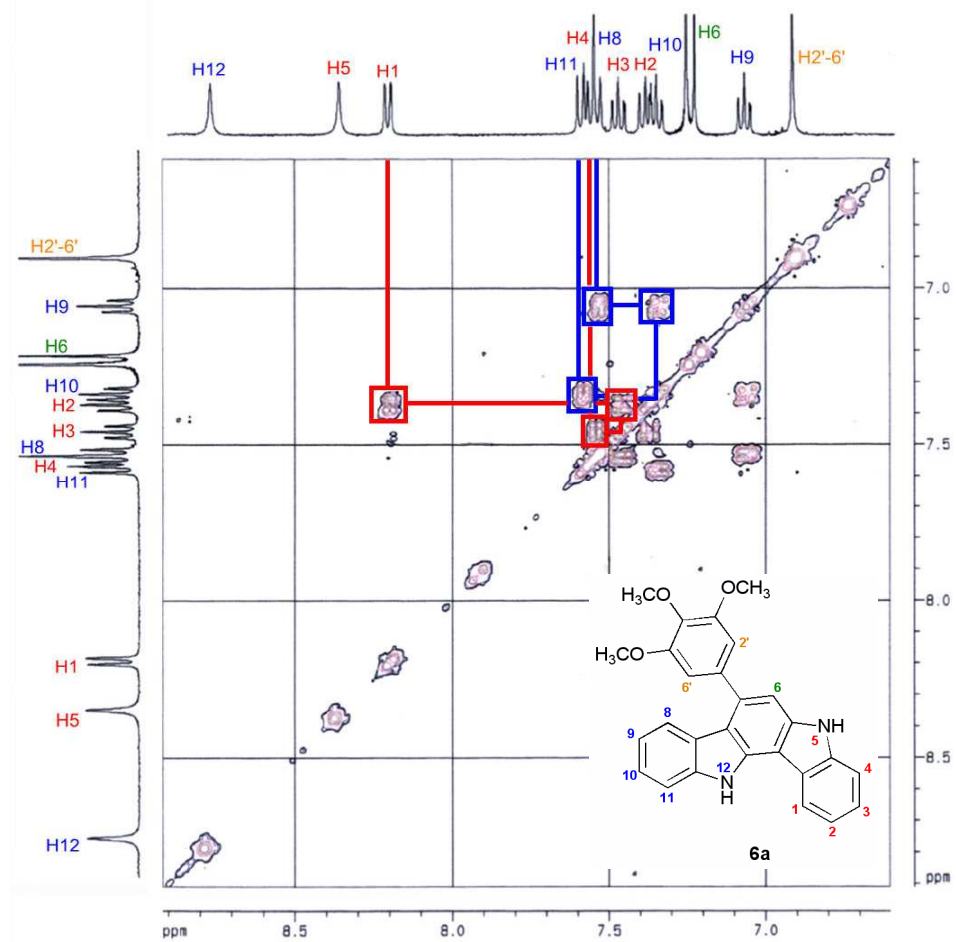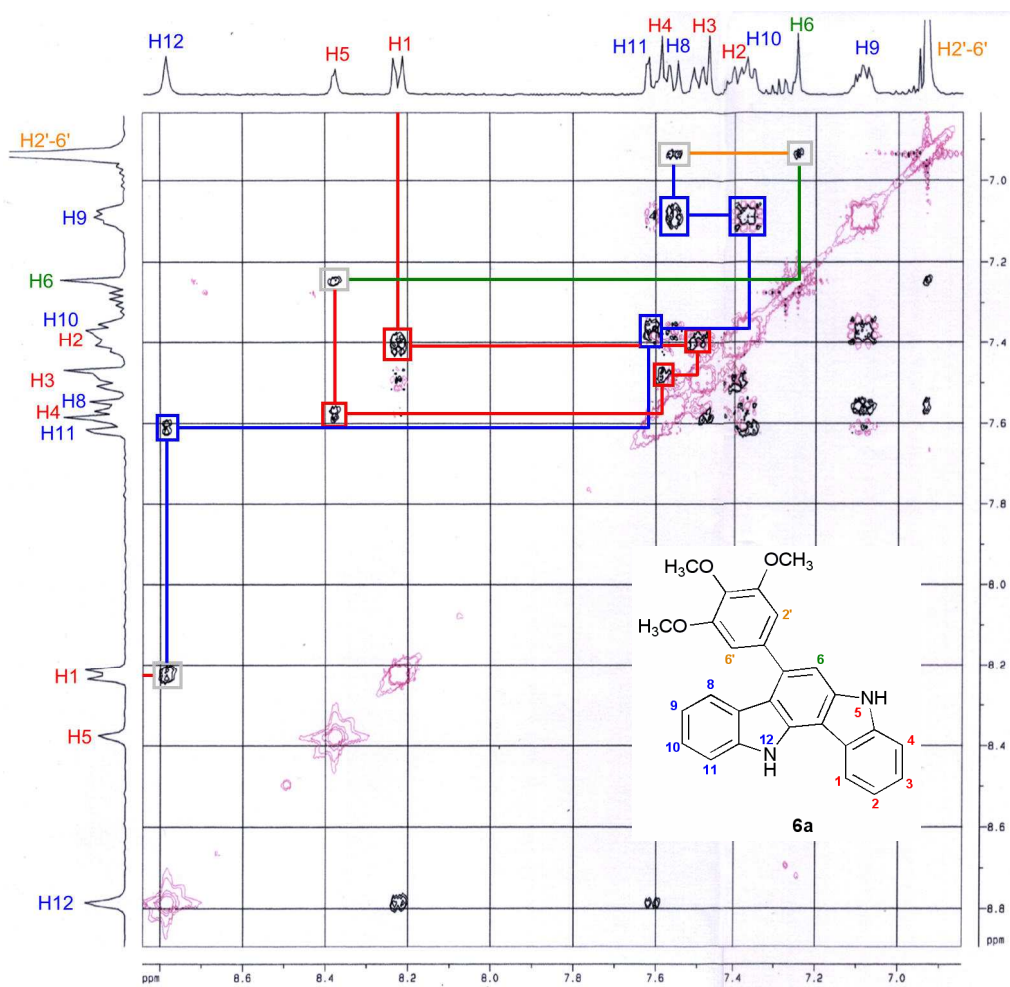

### $^1\text{H}$ and $^{13}\text{C}$ NMR spectra of compound **6b**

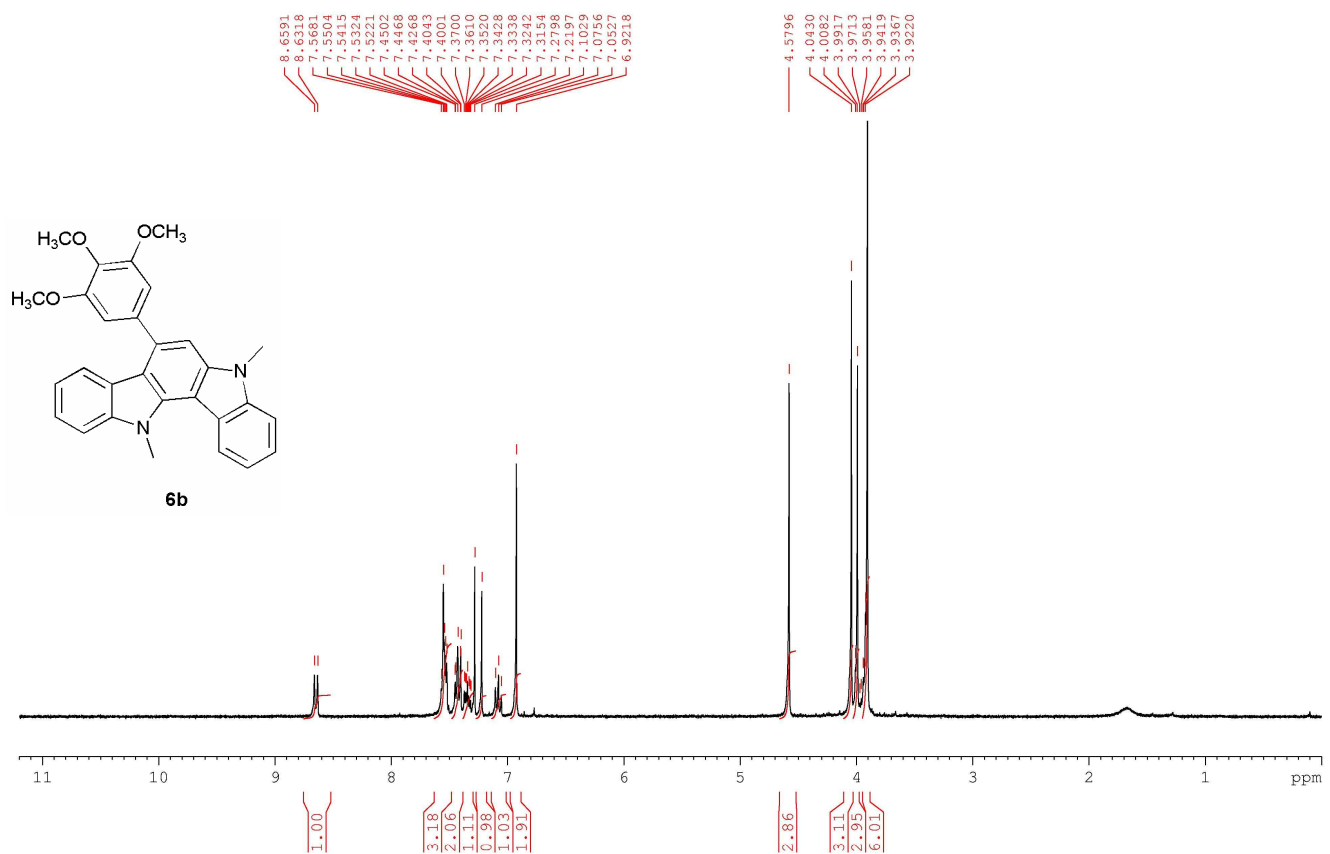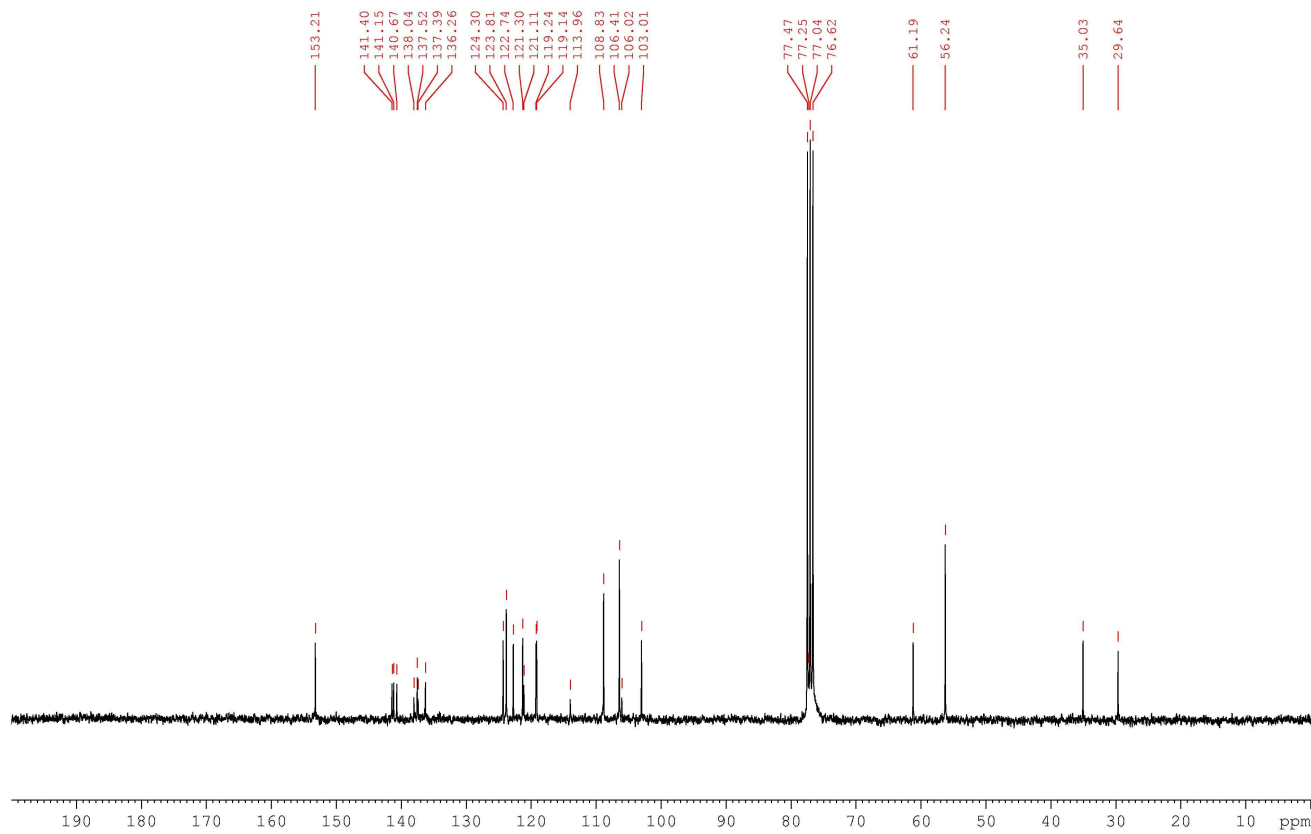

### $^1\text{H}$ and $^{13}\text{C}$ NMR spectra of compound **6c**

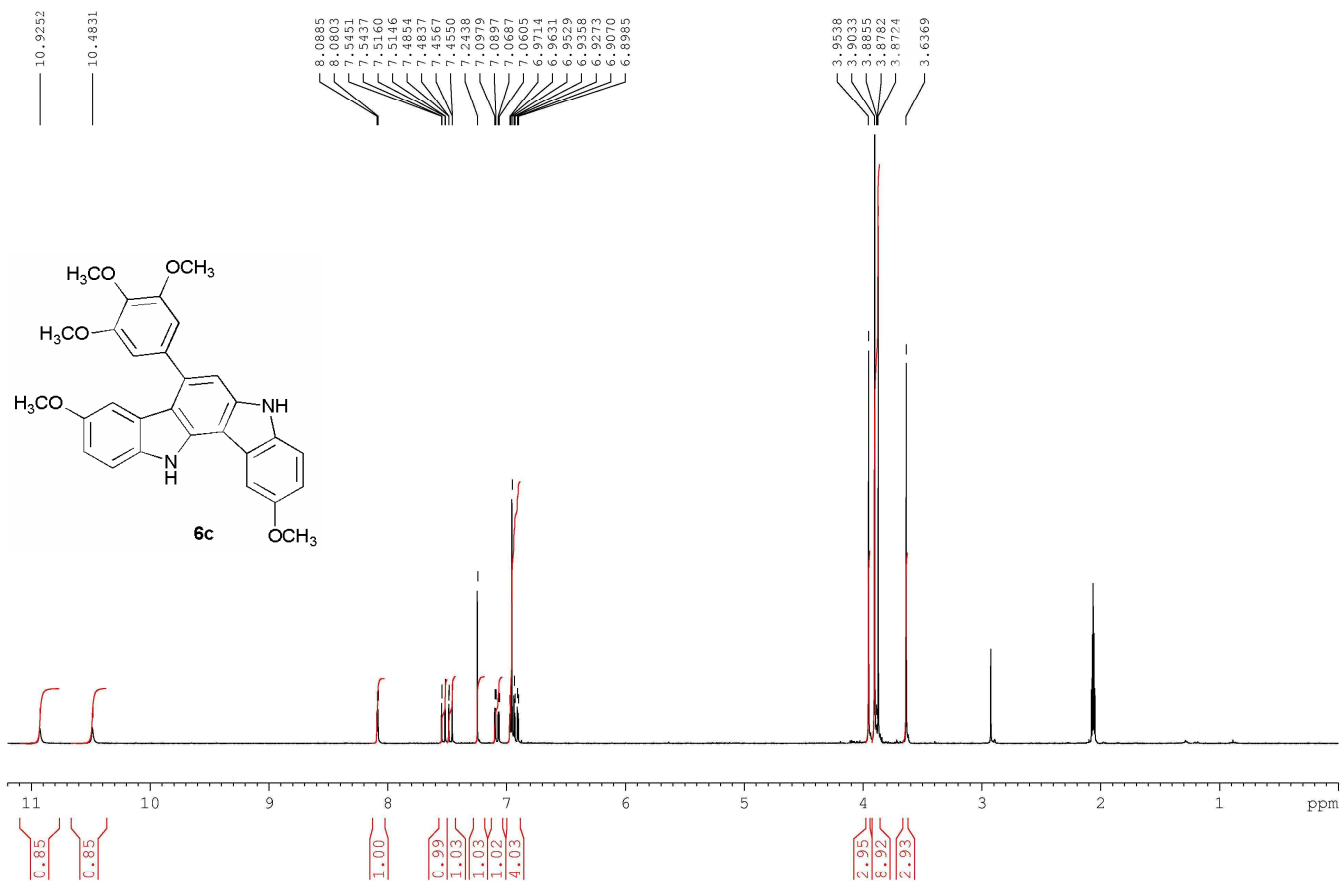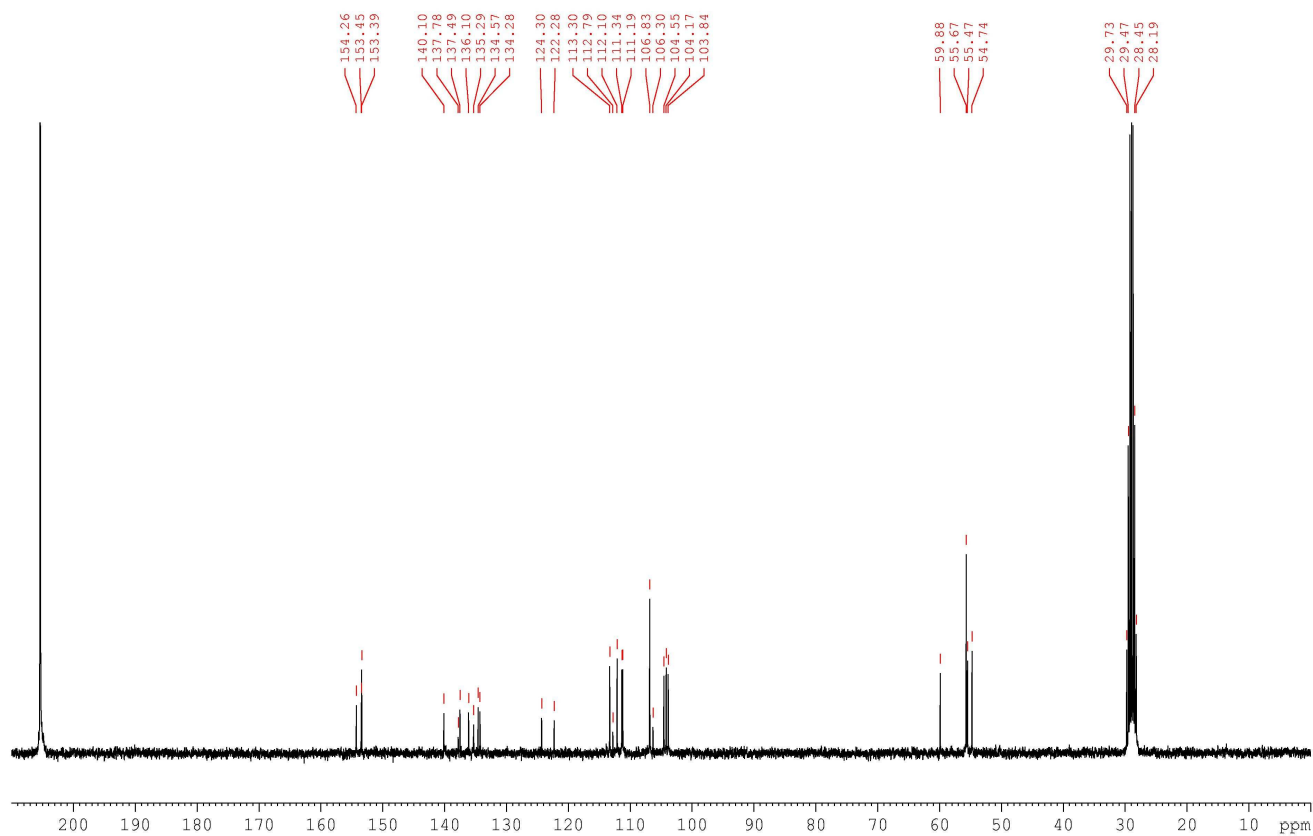

### $^1\text{H}$ and $^{13}\text{C}$ NMR spectra of compound **6d**

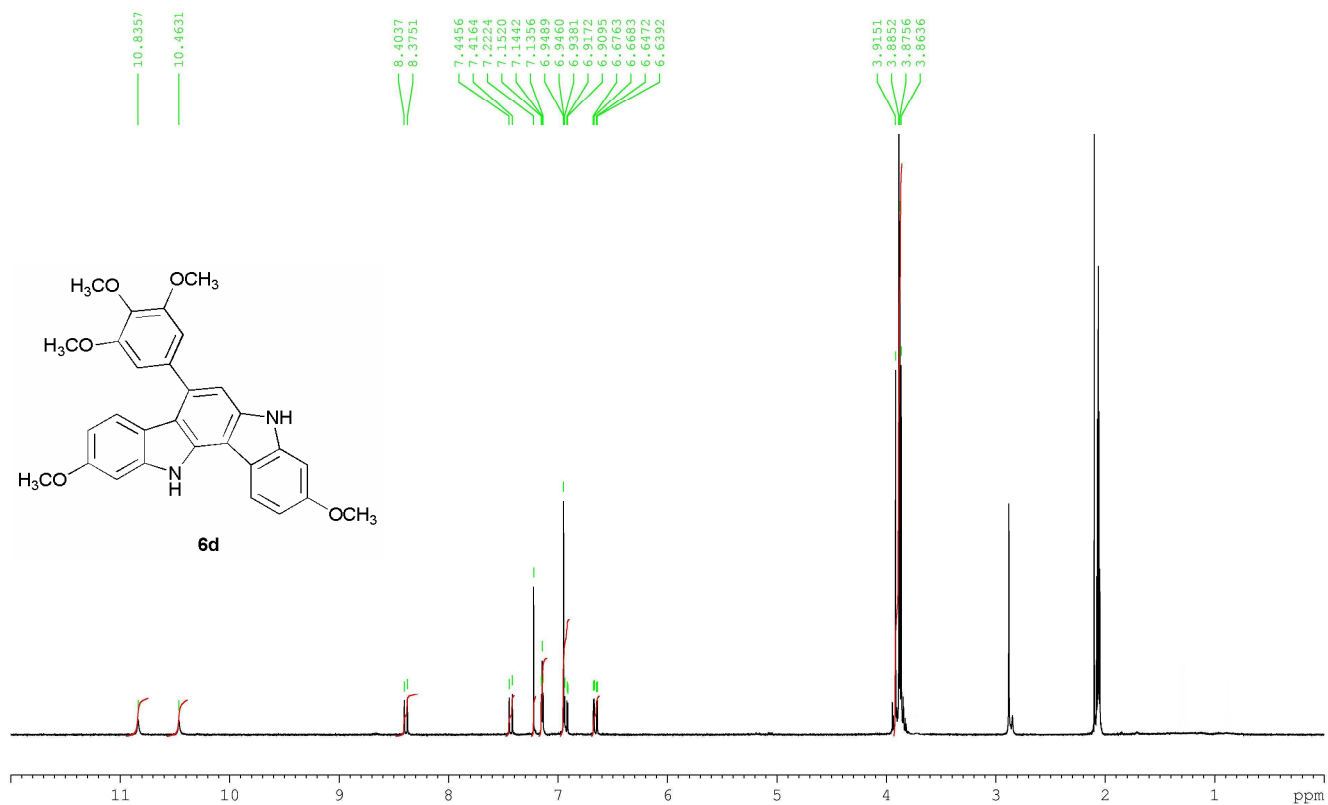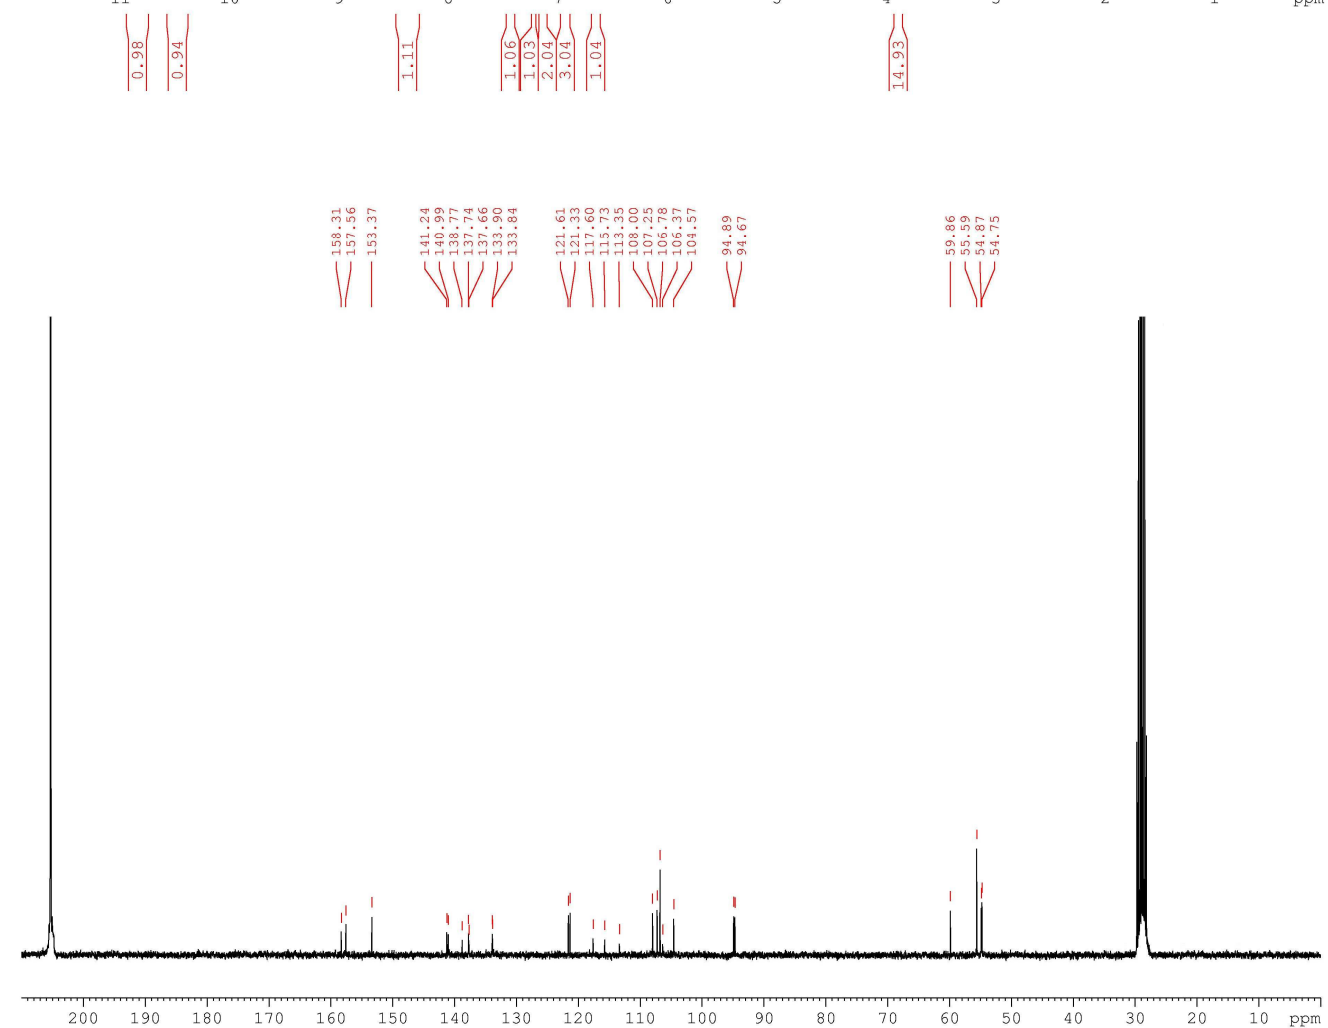

### <sup>1</sup>H and <sup>13</sup>C NMR spectra of compound 6e

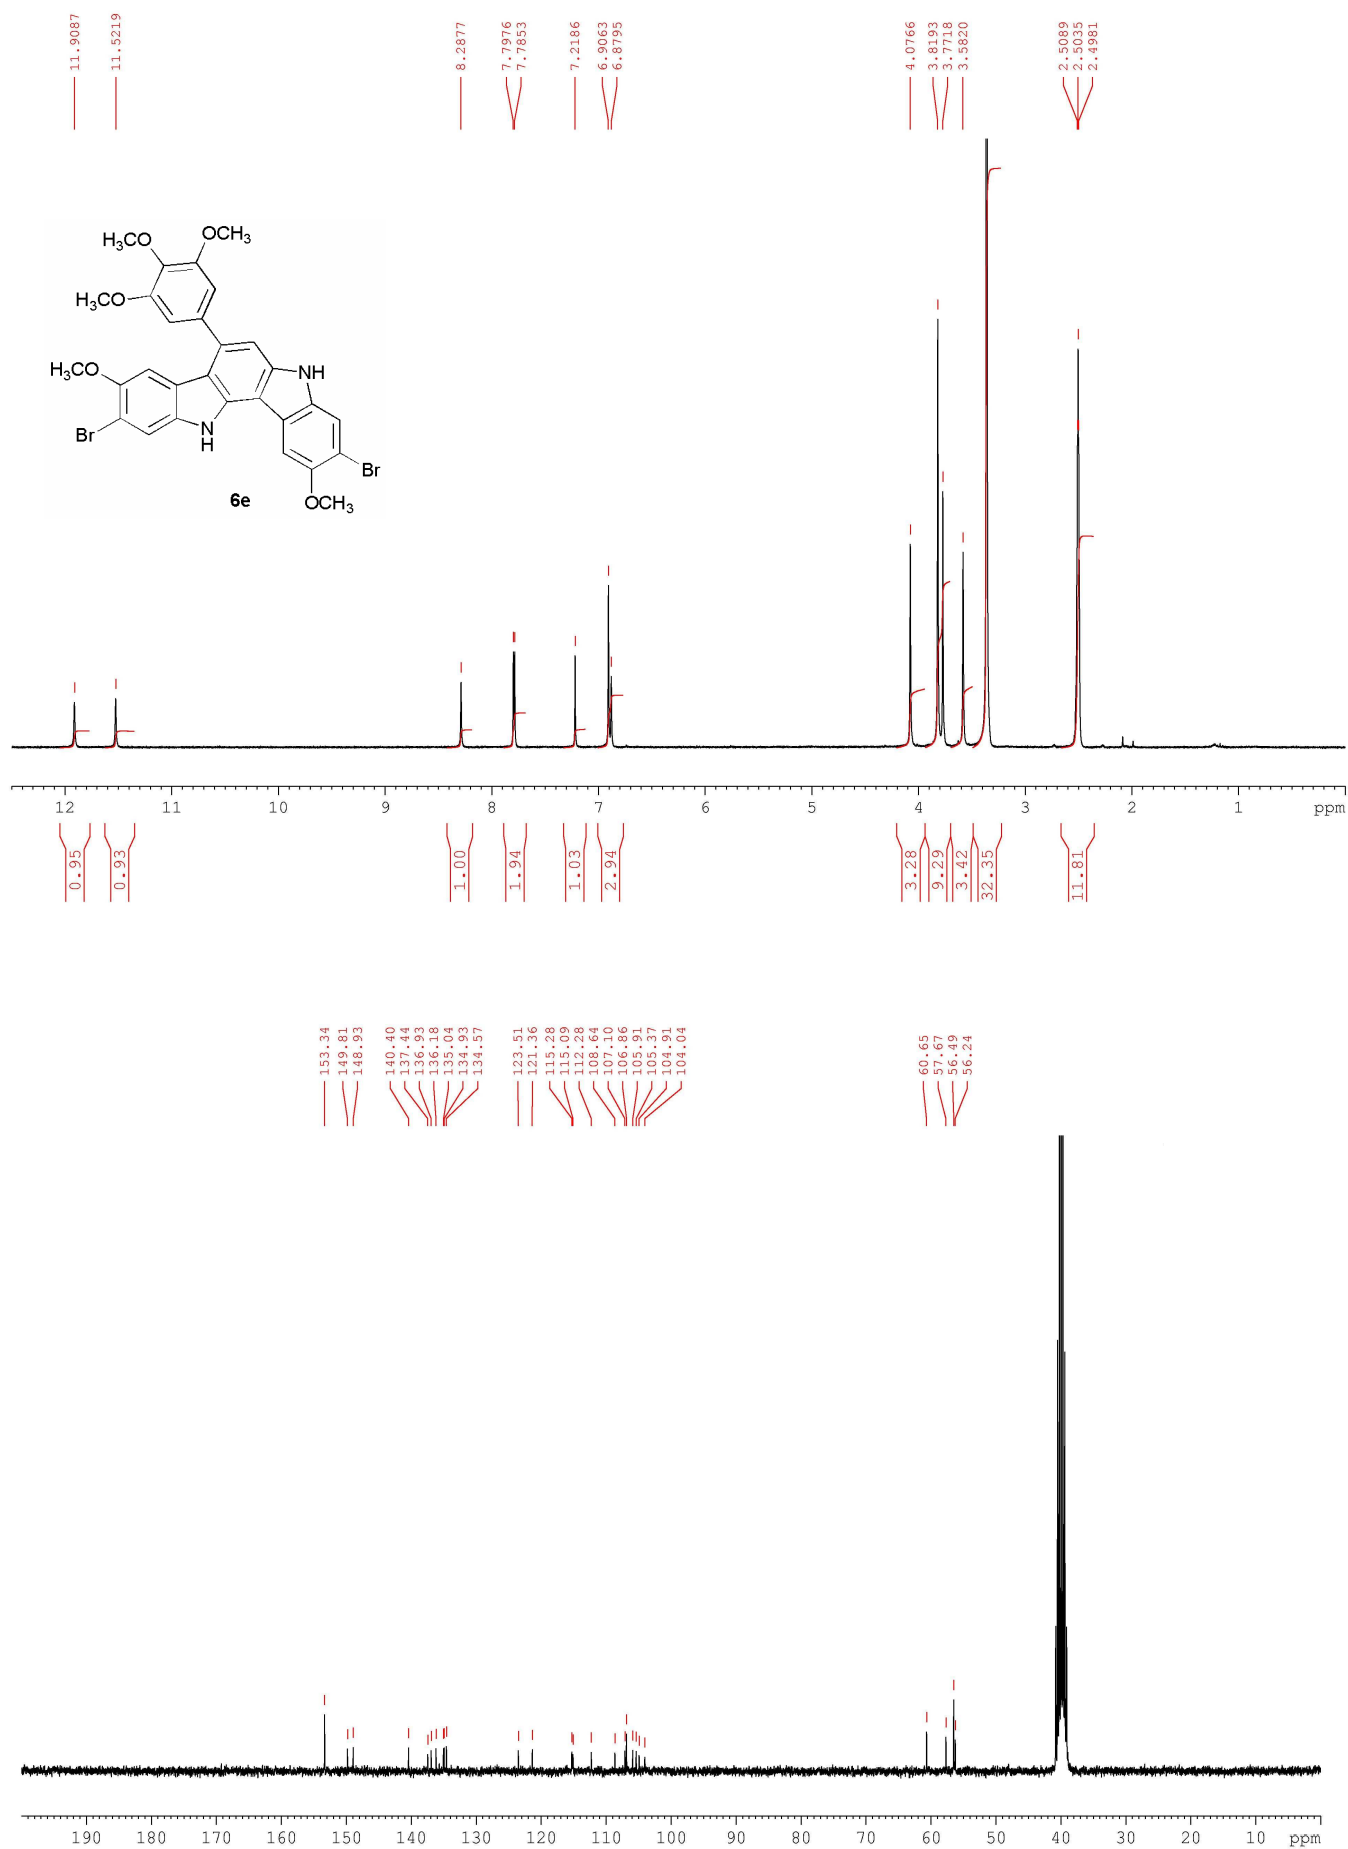

### $^1\text{H}$ and $^{13}\text{C}$ NMR spectra of compound **6f**

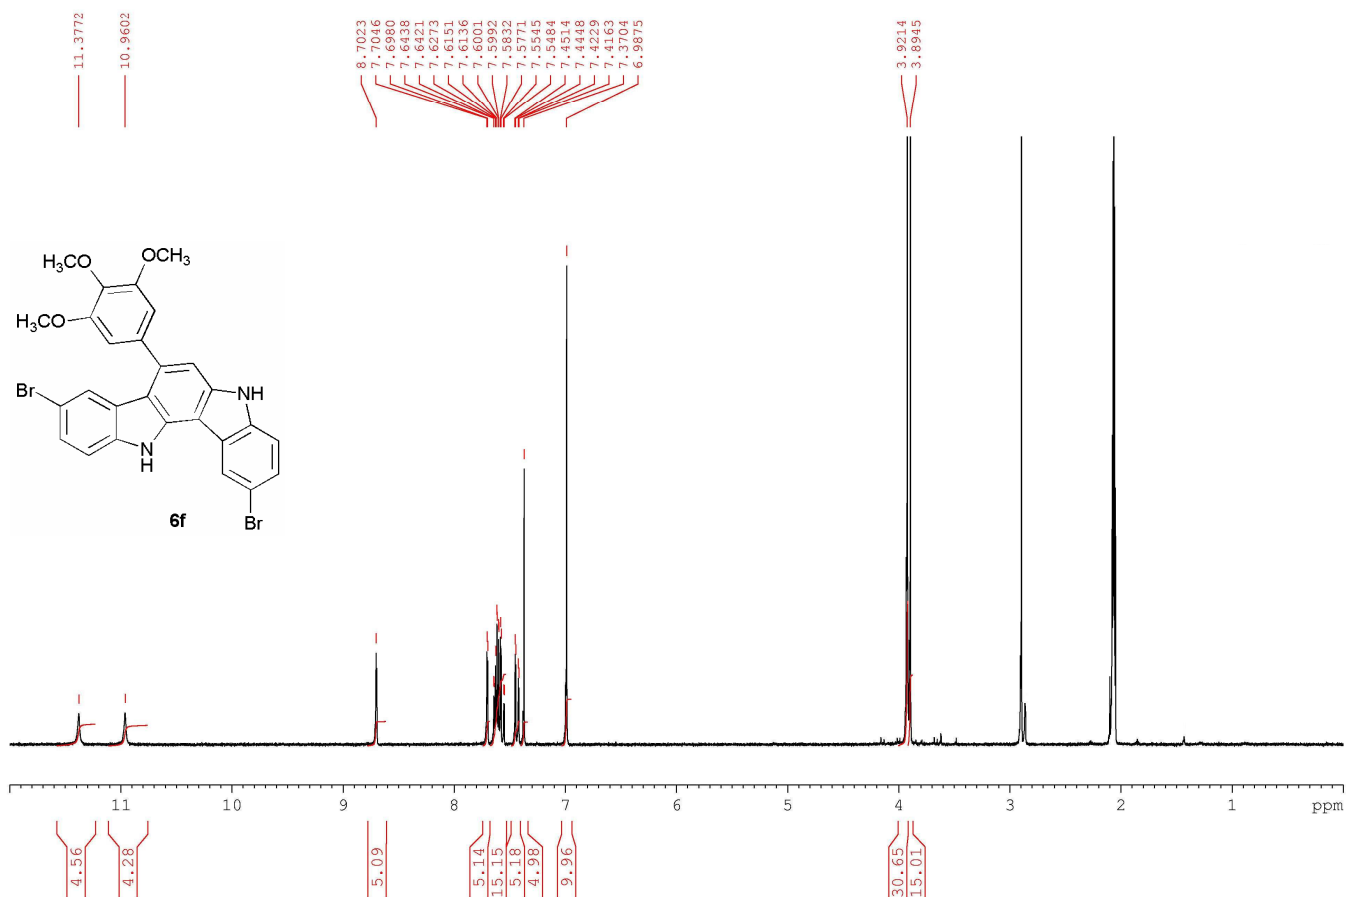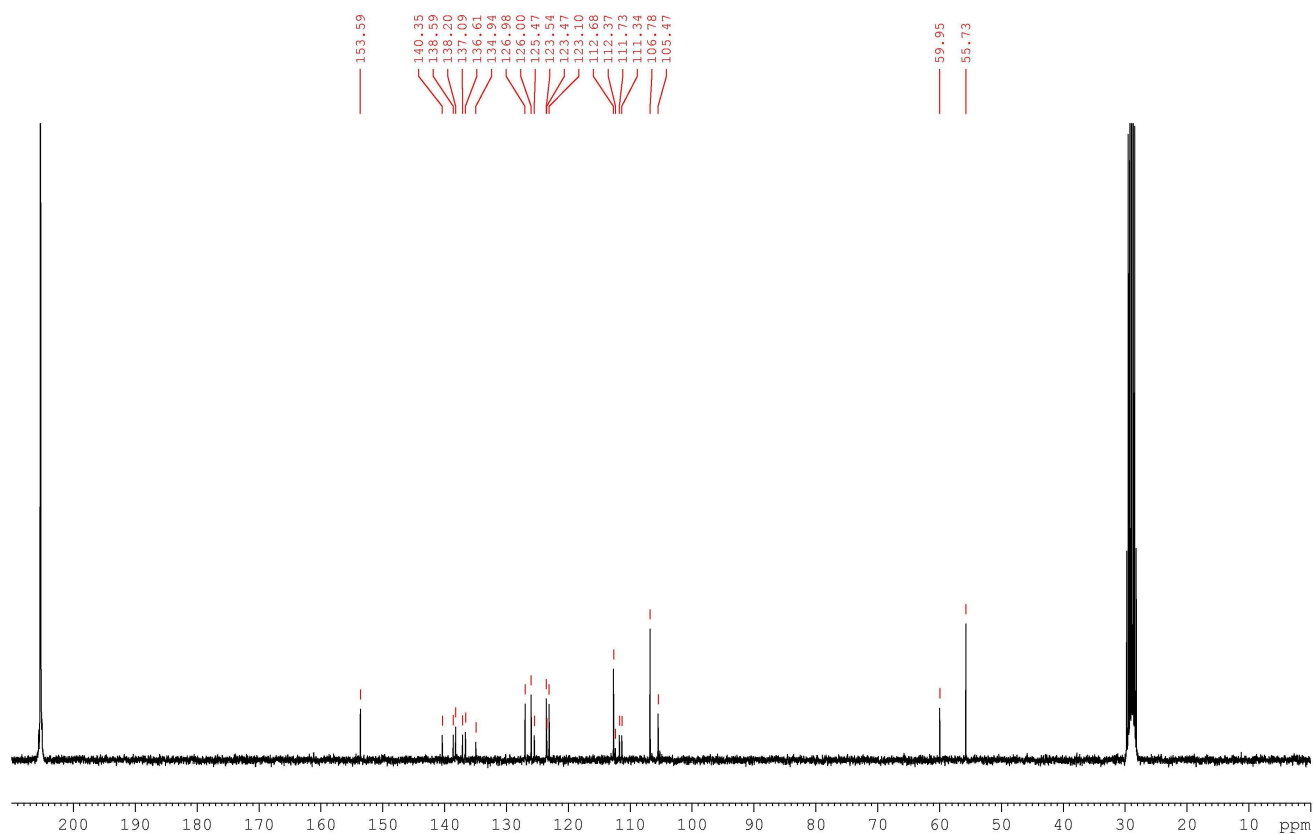



# <sup>1</sup>H and <sup>13</sup>C NMR spectra of compound **6g**

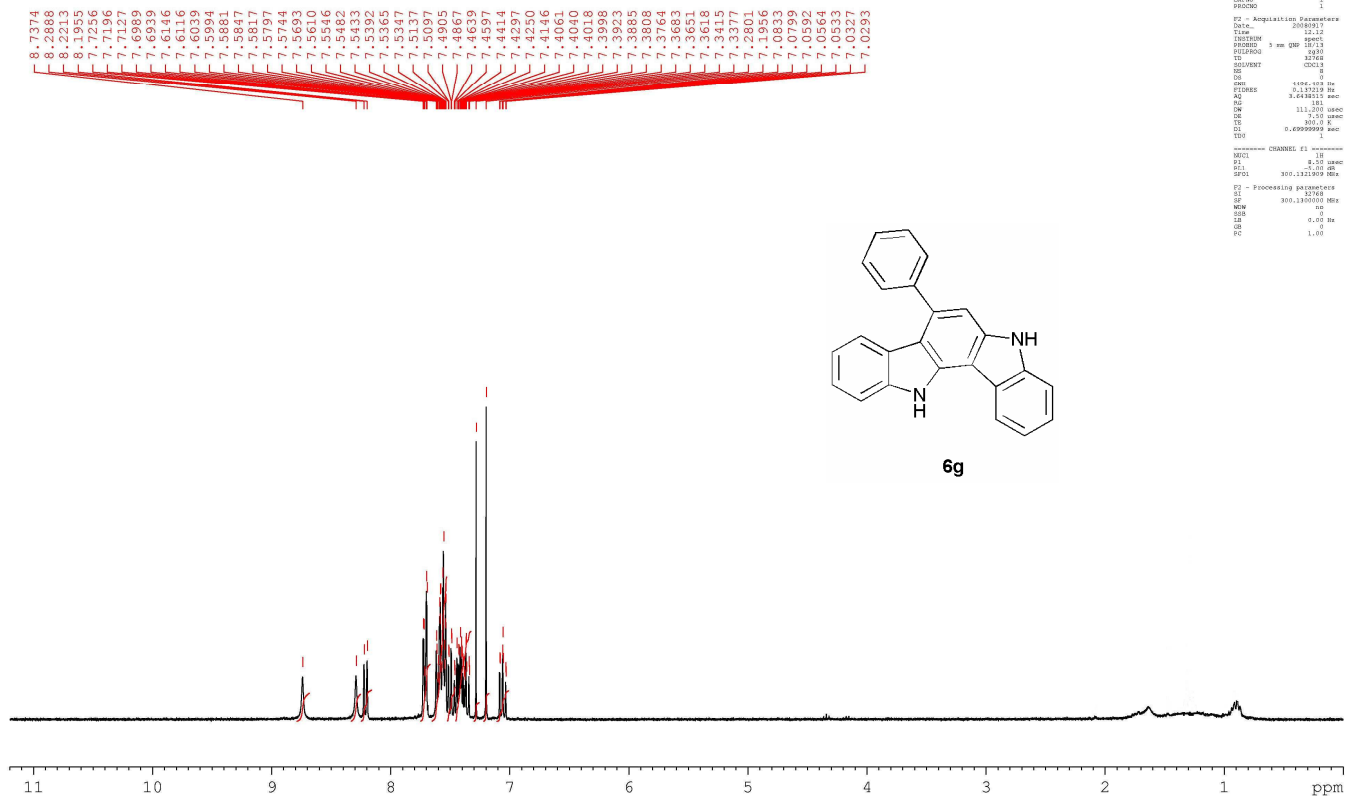

```

Current Data Parameters
Date_      20080117
Time       21:12
INSTRUM    spect
PROBHD     5 mm QNP
PULPROG    zgpg
TD          32768
SOLVENT    CDCl3
NS          8
DS          8
SWH         22675.736 Hz
FIDRES     0.432019 Hz
AQ         0.7225844 sec
RG         26008
DM         22.030 usec
DE         9.50 usec
TE         300.0 K
D1         2.5000000 sec
d11        0.0300000 sec
DELTA      2.40000010 sec
TD0        1

===== CHANNEL F1 =====
NUC1       13C
P1         4.20 usec
PL1        -2.00 dB
SFO1       75.4768051 MHz

===== CHANNEL F2 =====
CPDPRG2    waltz16
NUC2       1H
PCPD2     100.00 usec
PL2        -9.00 dB
PL12       15.00 dB
PL13       15.00 dB
SFO2       300.1312015 MHz

F2 - Processing parameters
SI         32768
SF         75.4677490 MHz
WDW        EM
SSB        0
GB         0
PC         1.40
    
```

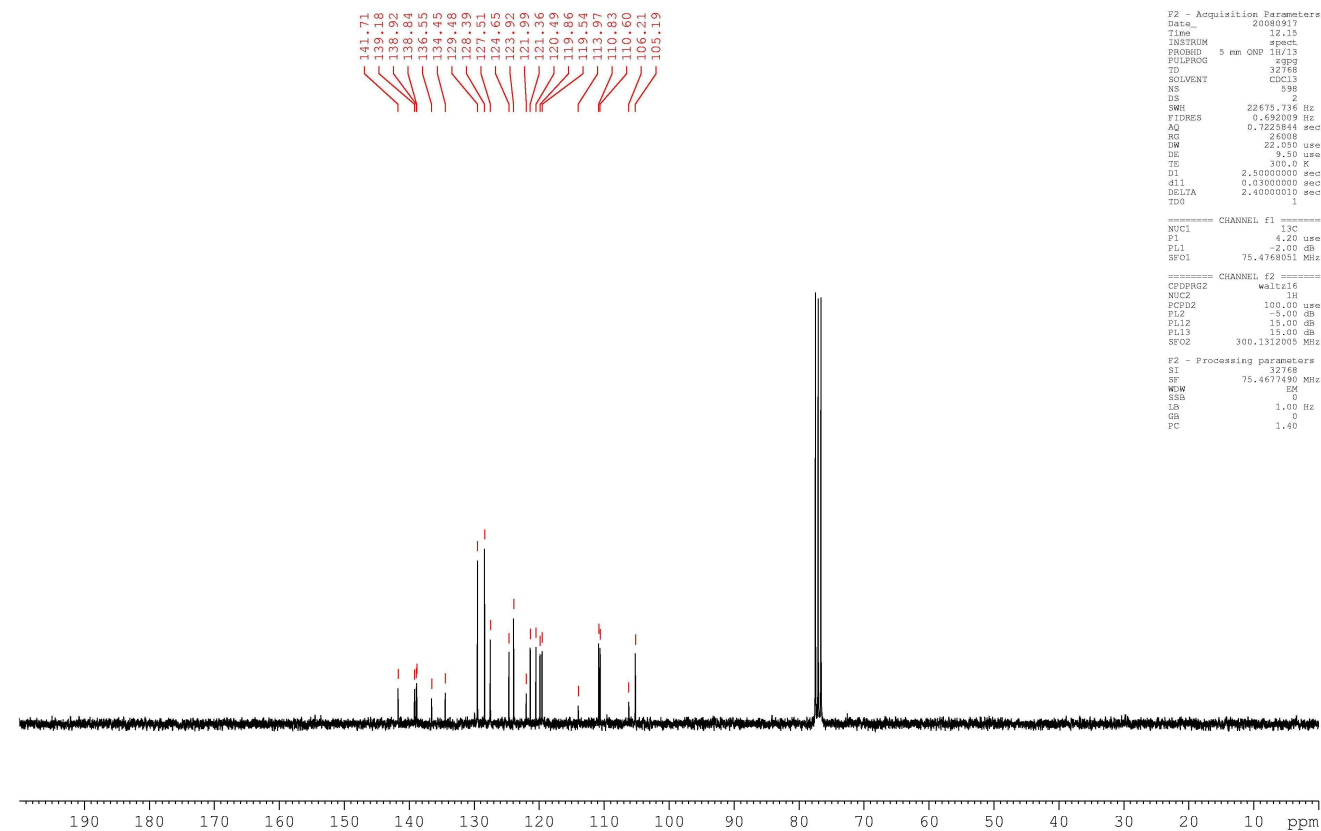

```

NAME       i-xc-K7740
EXPNO      2
PROCNO     1

F2 - Acquisition Parameters
Date_      20080917
Time       12:15
INSTRUM    spect
PROBHD     5 mm QNP
PULPROG    zgpg
TD          32768
SOLVENT    CDCl3
NS          8
DS          8
SWH         22675.736 Hz
FIDRES     0.432019 Hz
AQ         0.7225844 sec
RG         26008
DM         22.030 usec
DE         9.50 usec
TE         300.0 K
D1         2.5000000 sec
d11        0.0300000 sec
DELTA      2.40000010 sec
TD0        1

===== CHANNEL F1 =====
NUC1       13C
P1         4.20 usec
PL1        -2.00 dB
SFO1       75.4768051 MHz

===== CHANNEL F2 =====
CPDPRG2    waltz16
NUC2       1H
PCPD2     100.00 usec
PL2        -9.00 dB
PL12       15.00 dB
PL13       15.00 dB
SFO2       300.1312015 MHz

F2 - Processing parameters
SI         32768
SF         75.4677490 MHz
WDW        EM
SSB        0
GB         0
PC         1.40
    
```

### <sup>1</sup>H and <sup>13</sup>C NMR spectra of compound **6h**

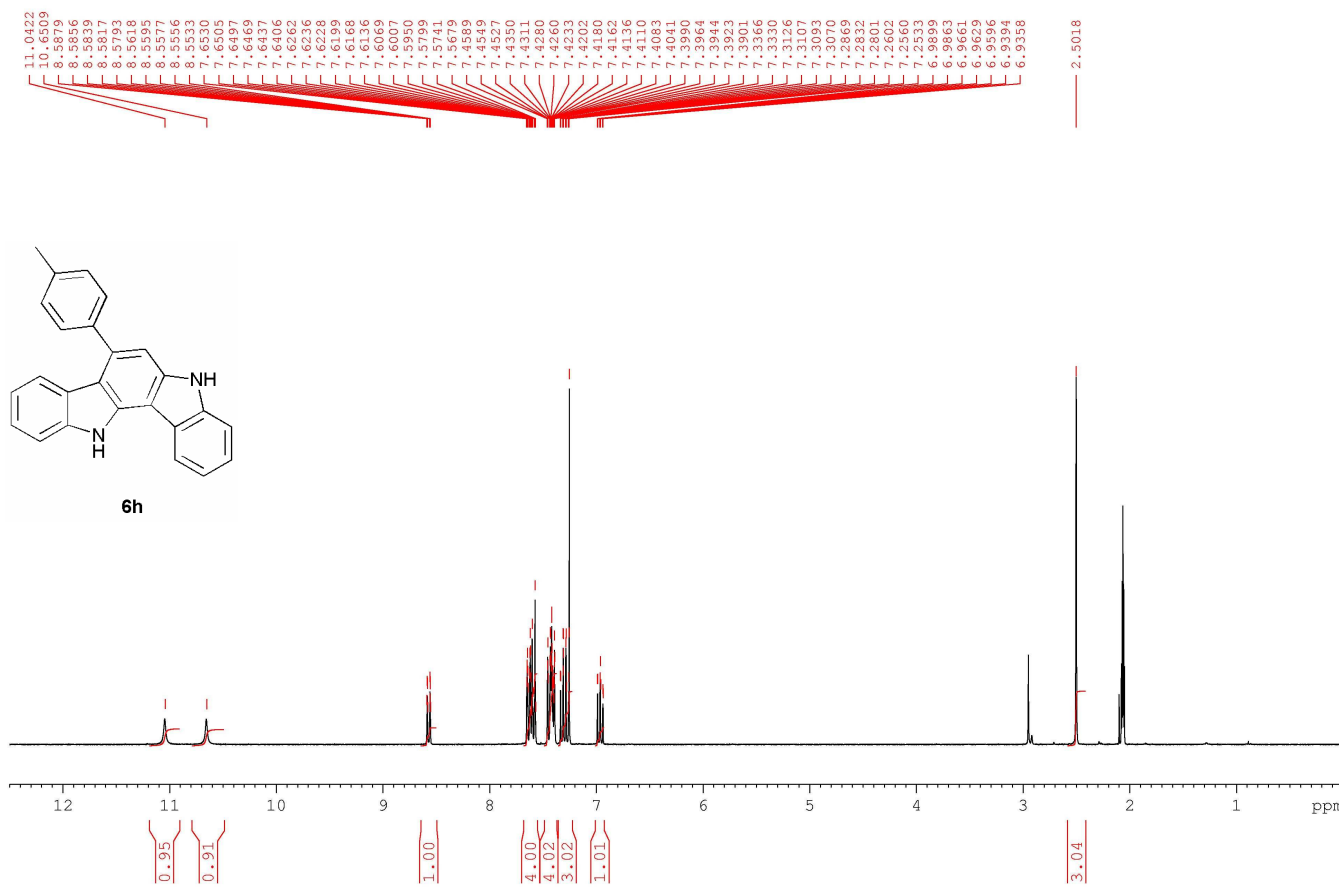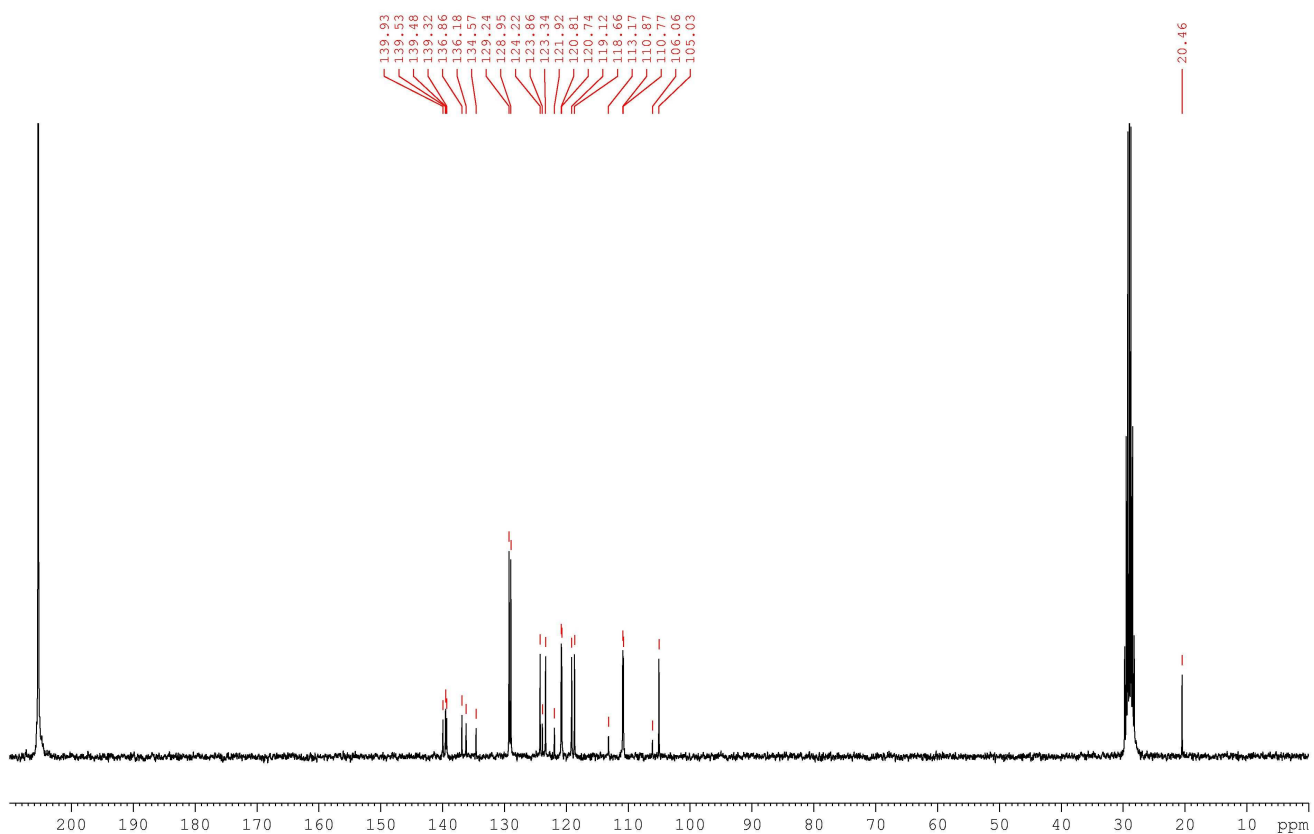

### $^1\text{H}$ and $^{13}\text{C}$ NMR spectra of compound **6i**

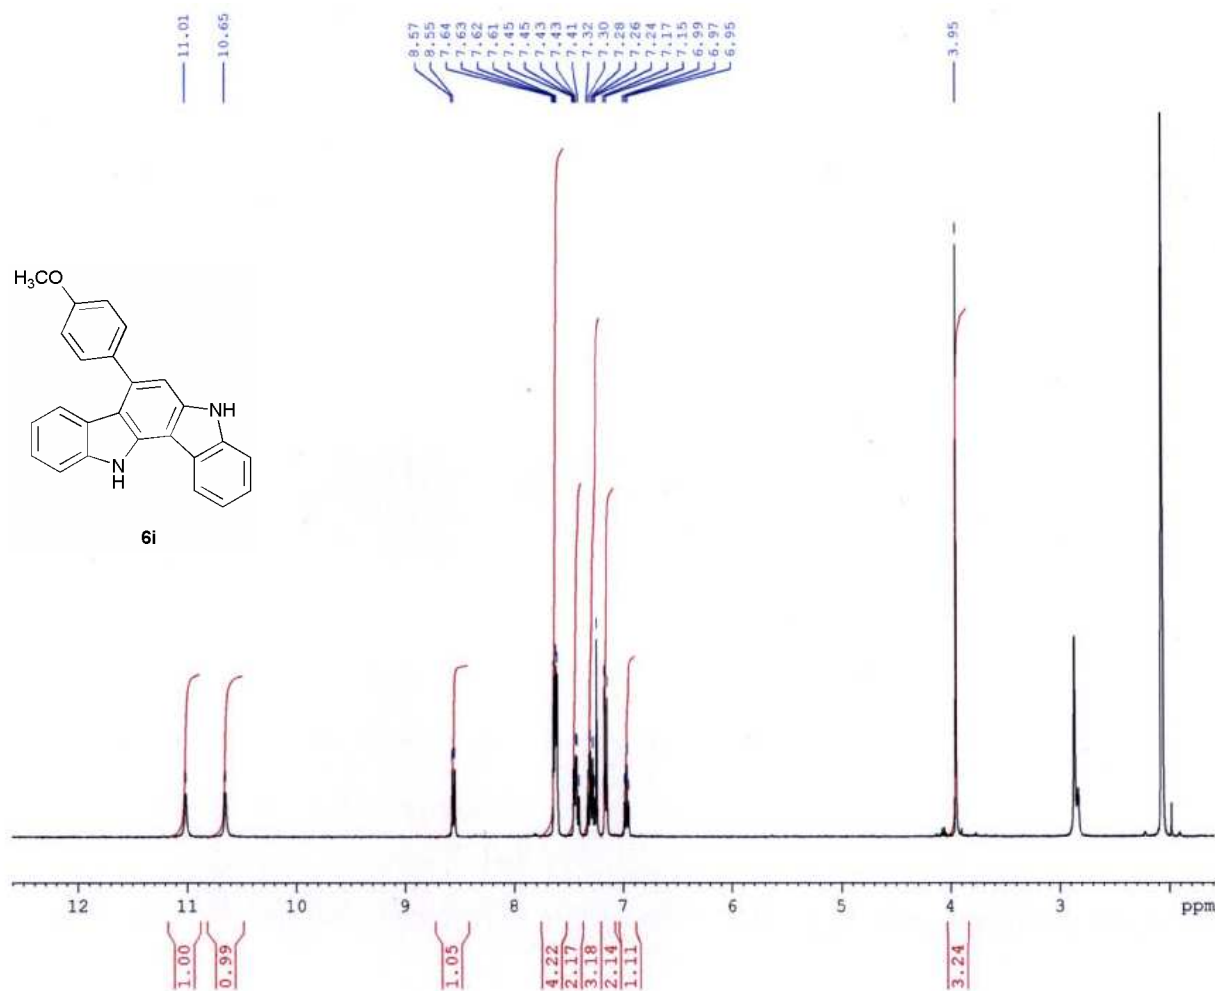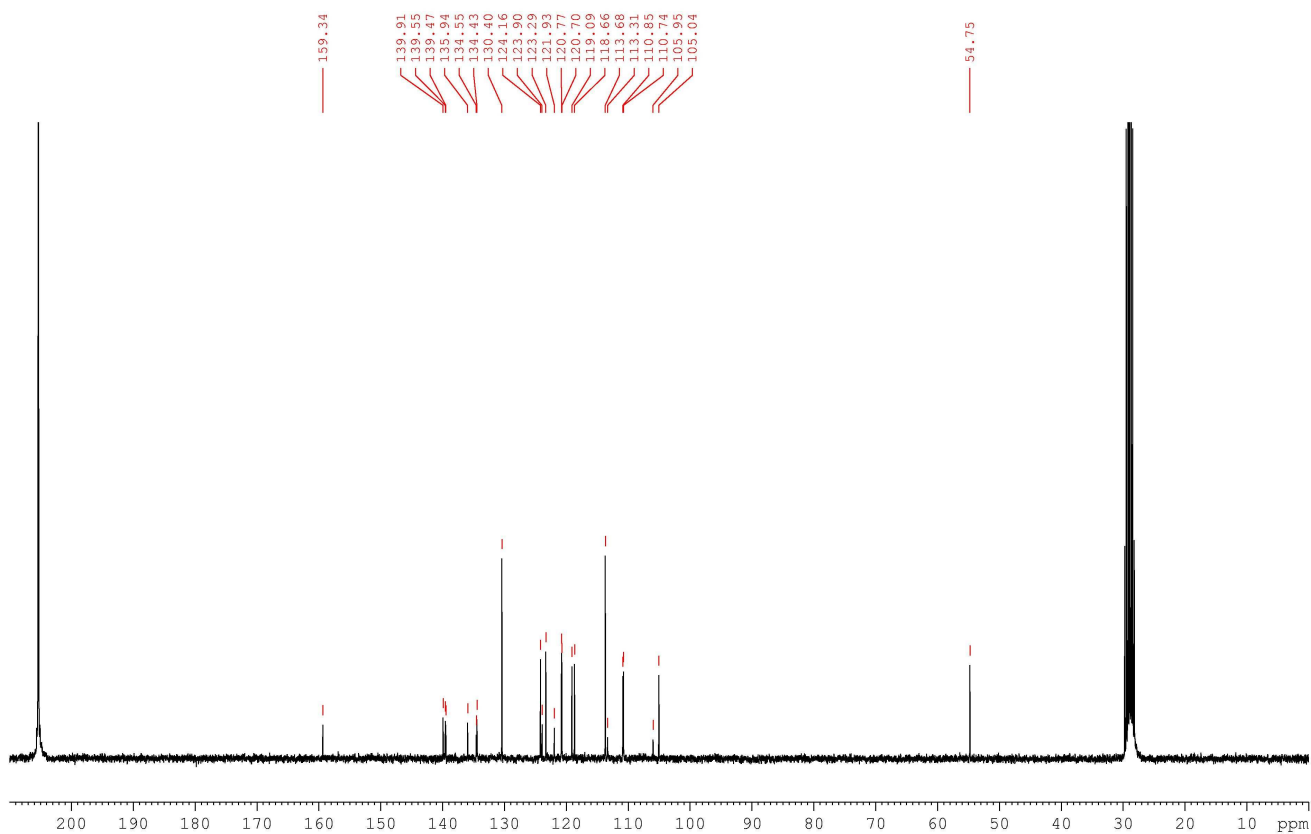

### $^1\text{H}$ and $^{13}\text{C}$ NMR spectra of compound **6j**

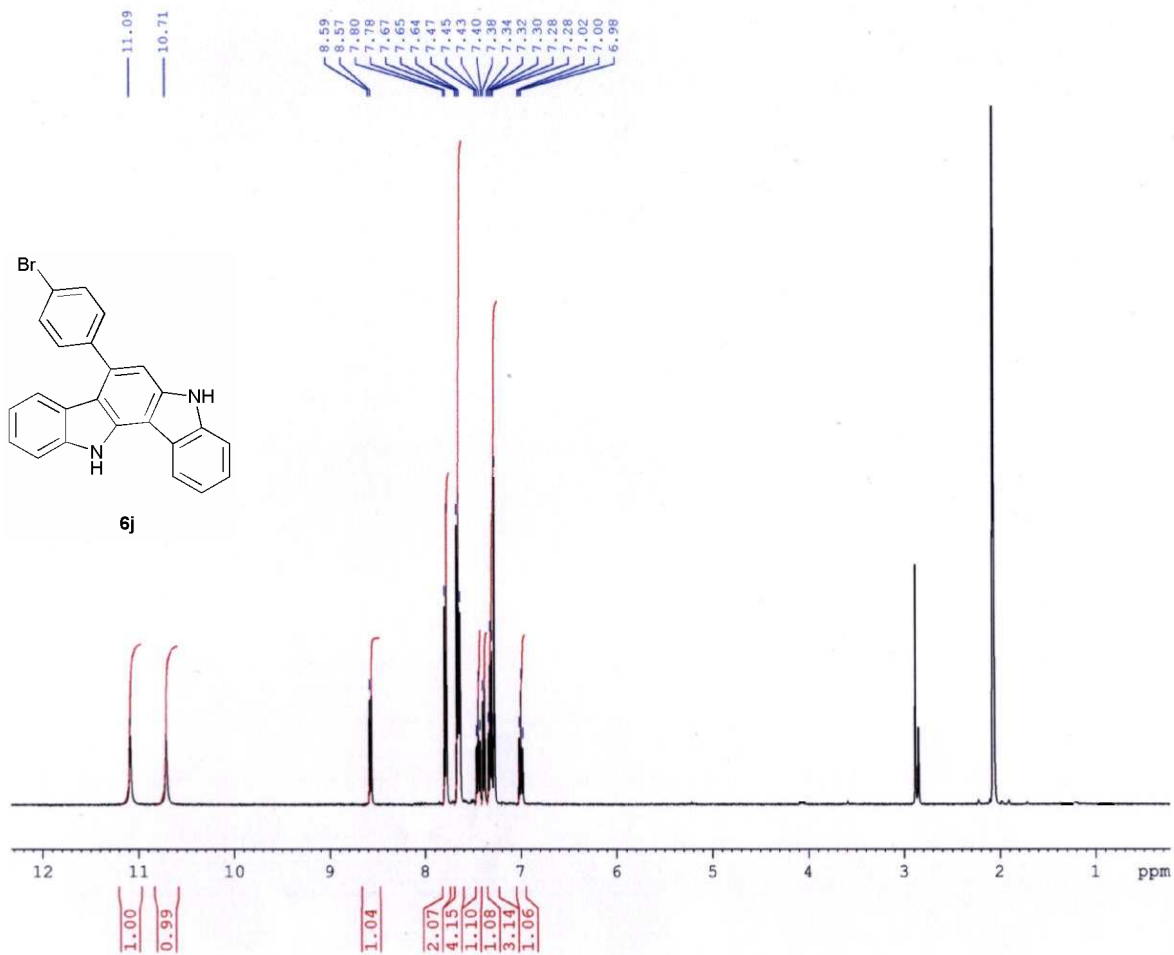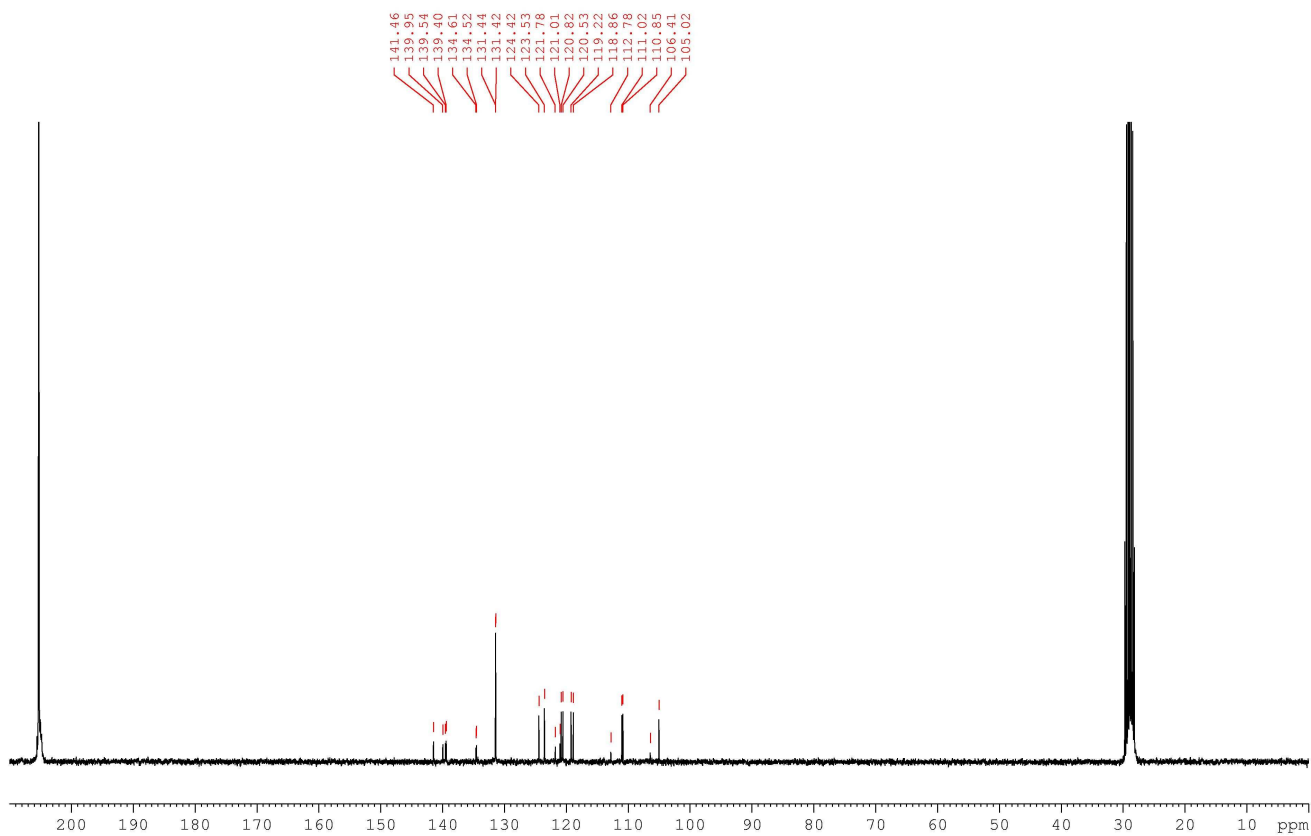

### $^1\text{H}$ and $^{13}\text{C}$ NMR spectra of compound **6k**

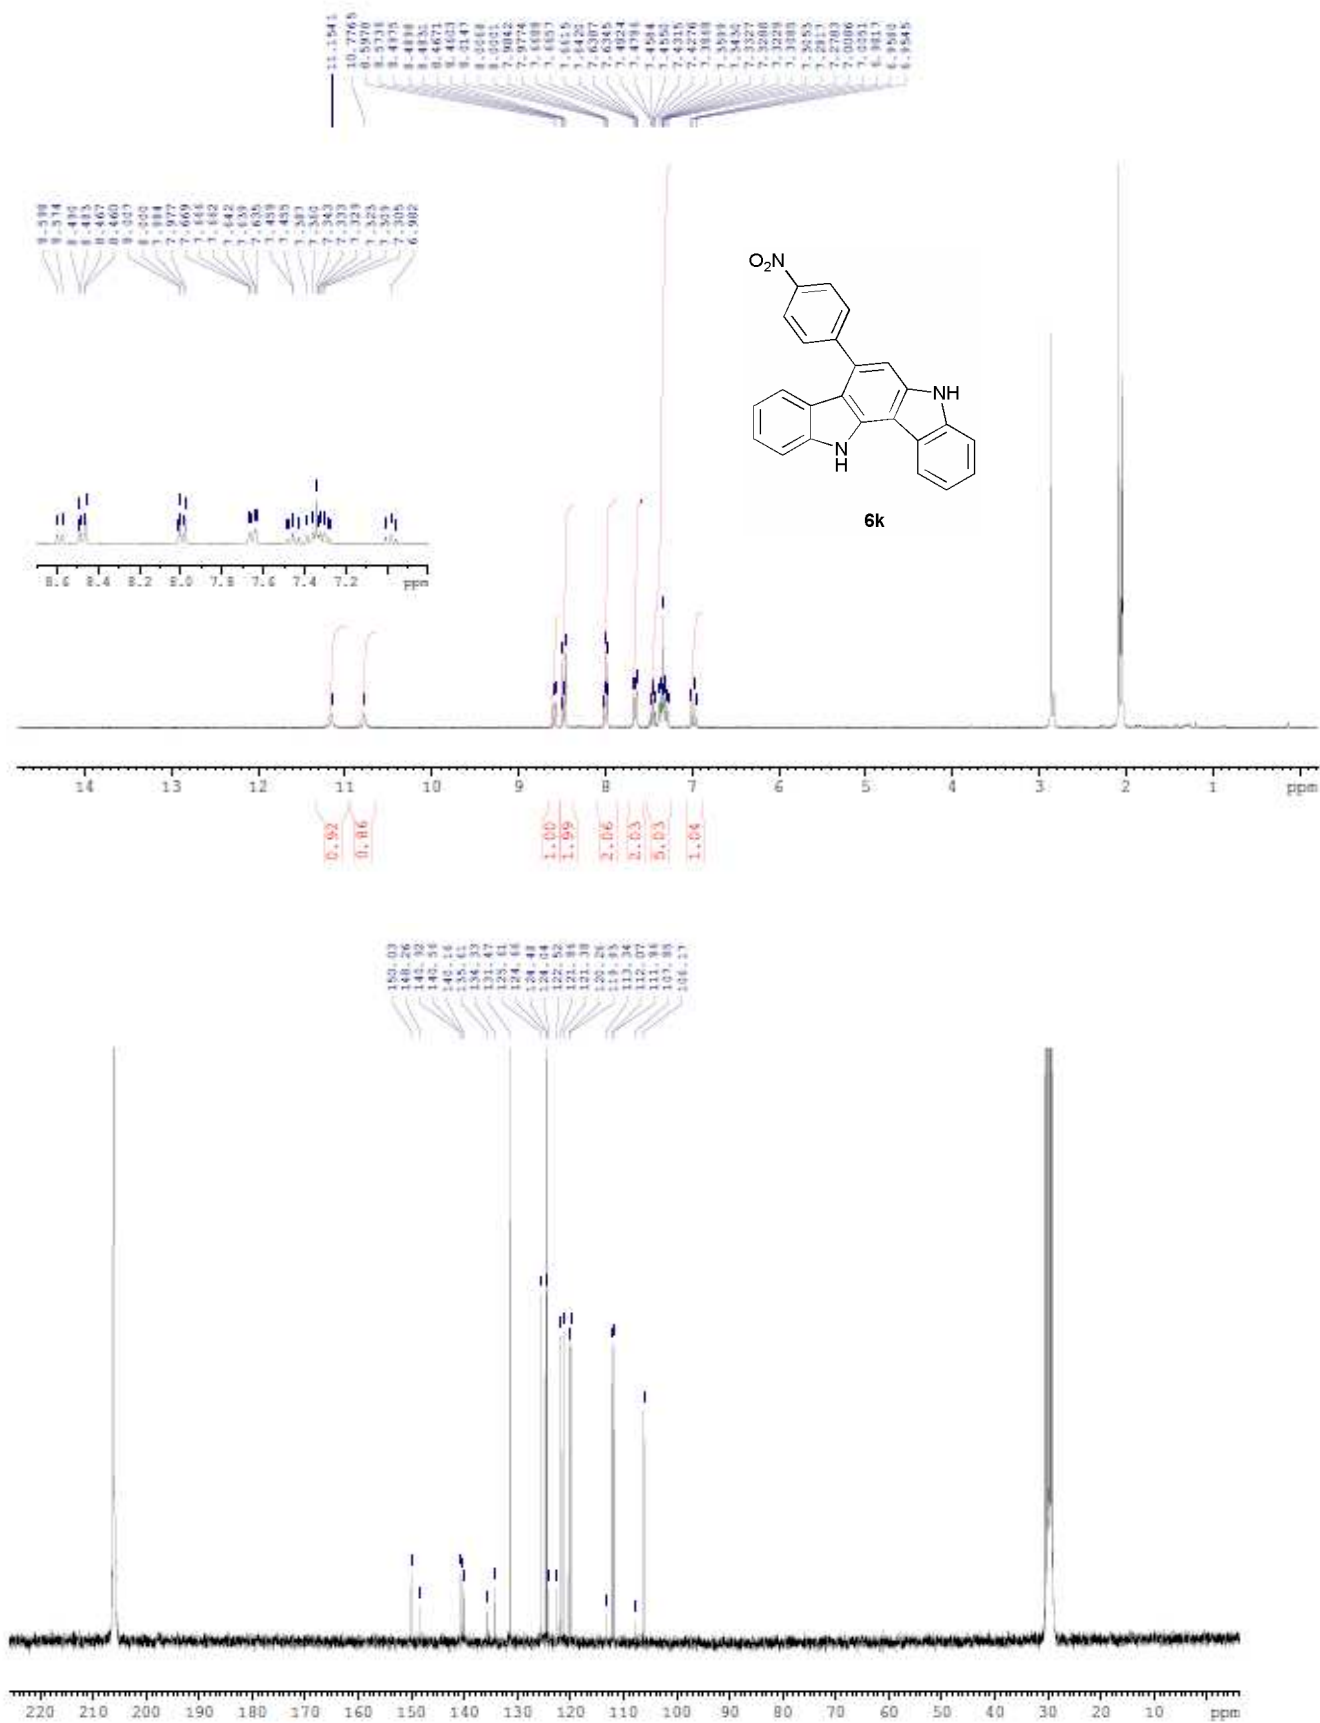

### $^1\text{H}$ and $^{13}\text{C}$ NMR spectra of compound **10**

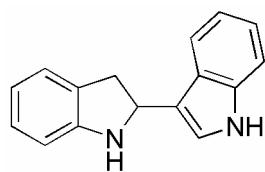

**10**

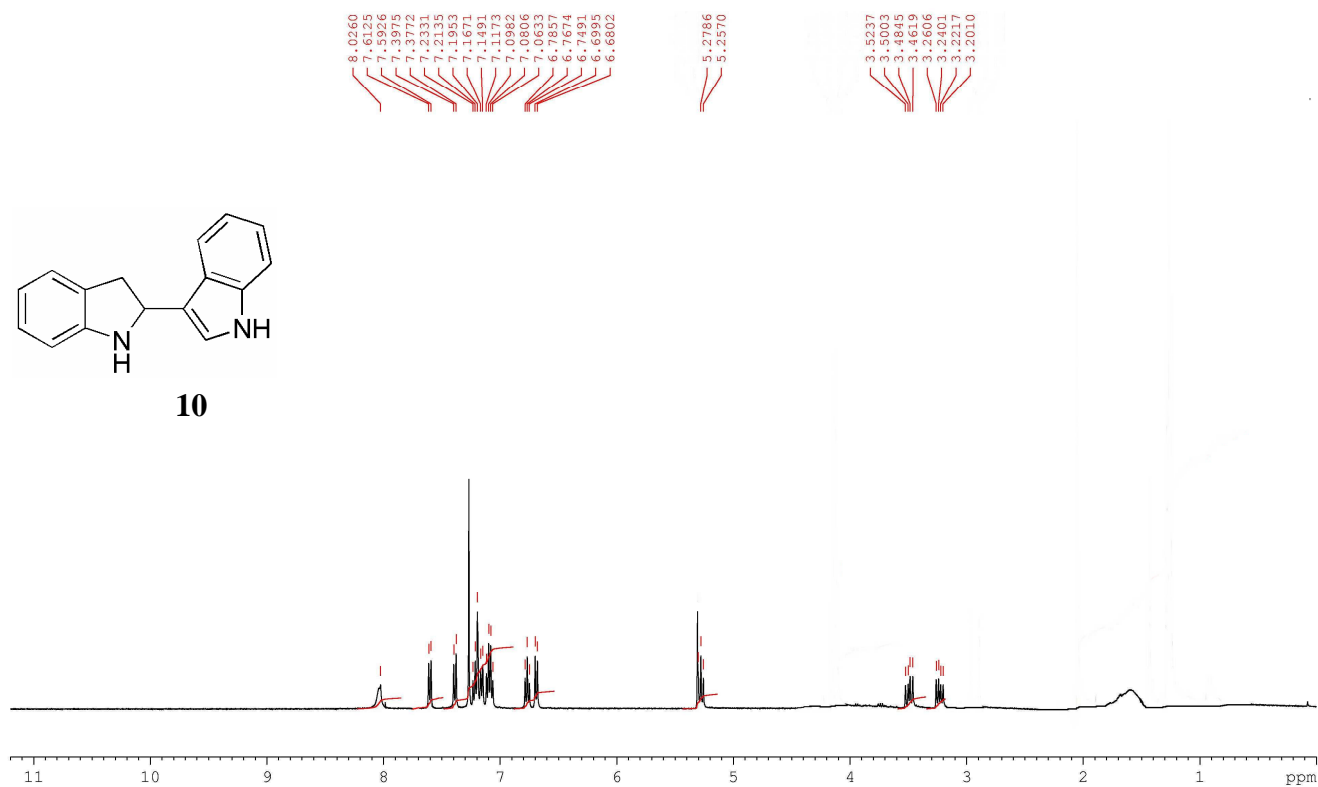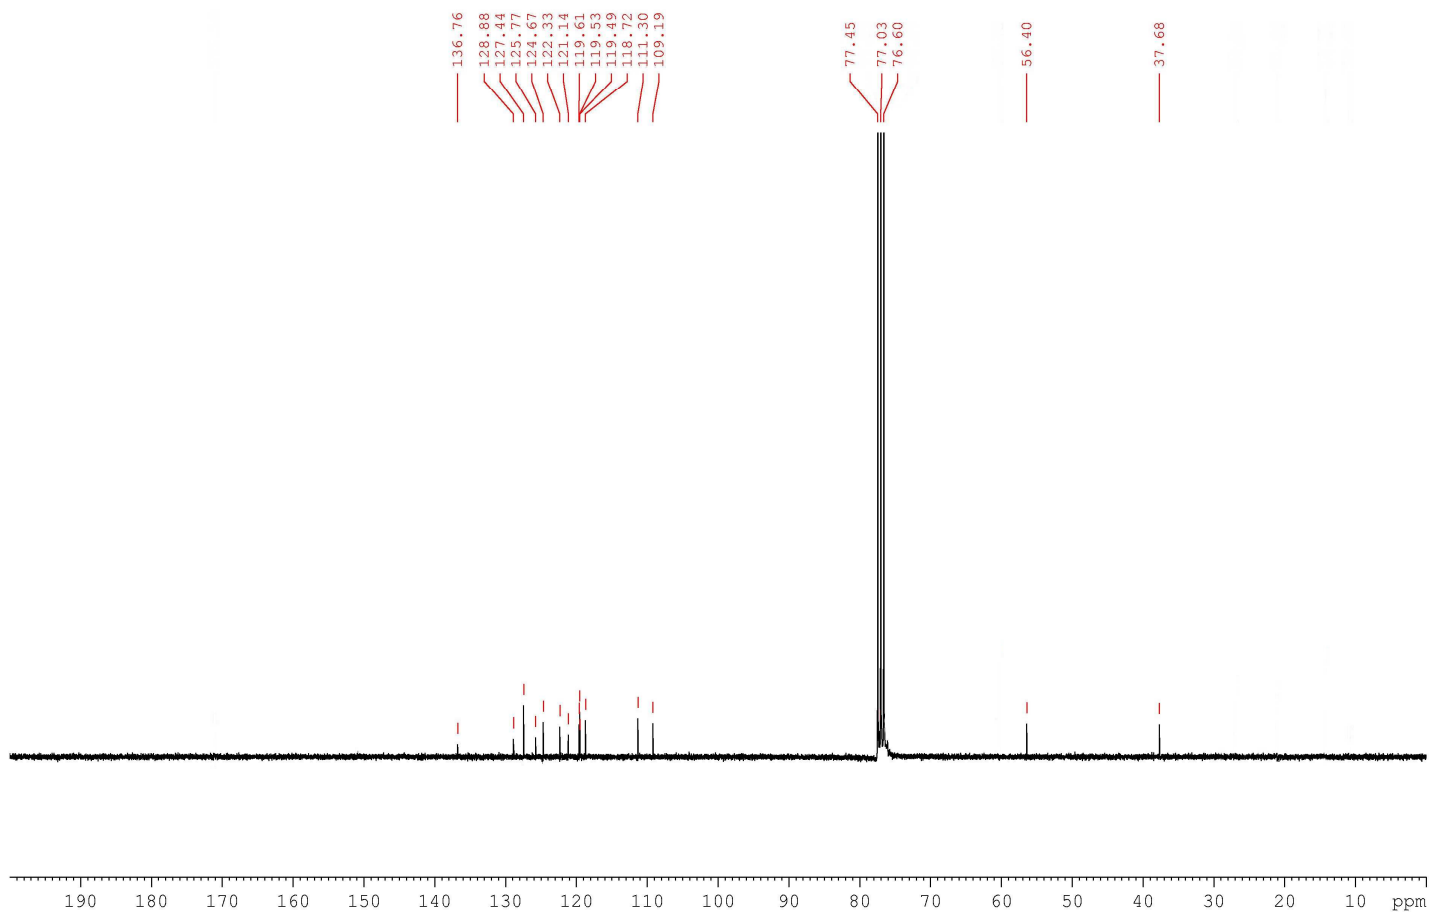

### <sup>1</sup>H and <sup>13</sup>C NMR spectra of compound **5**

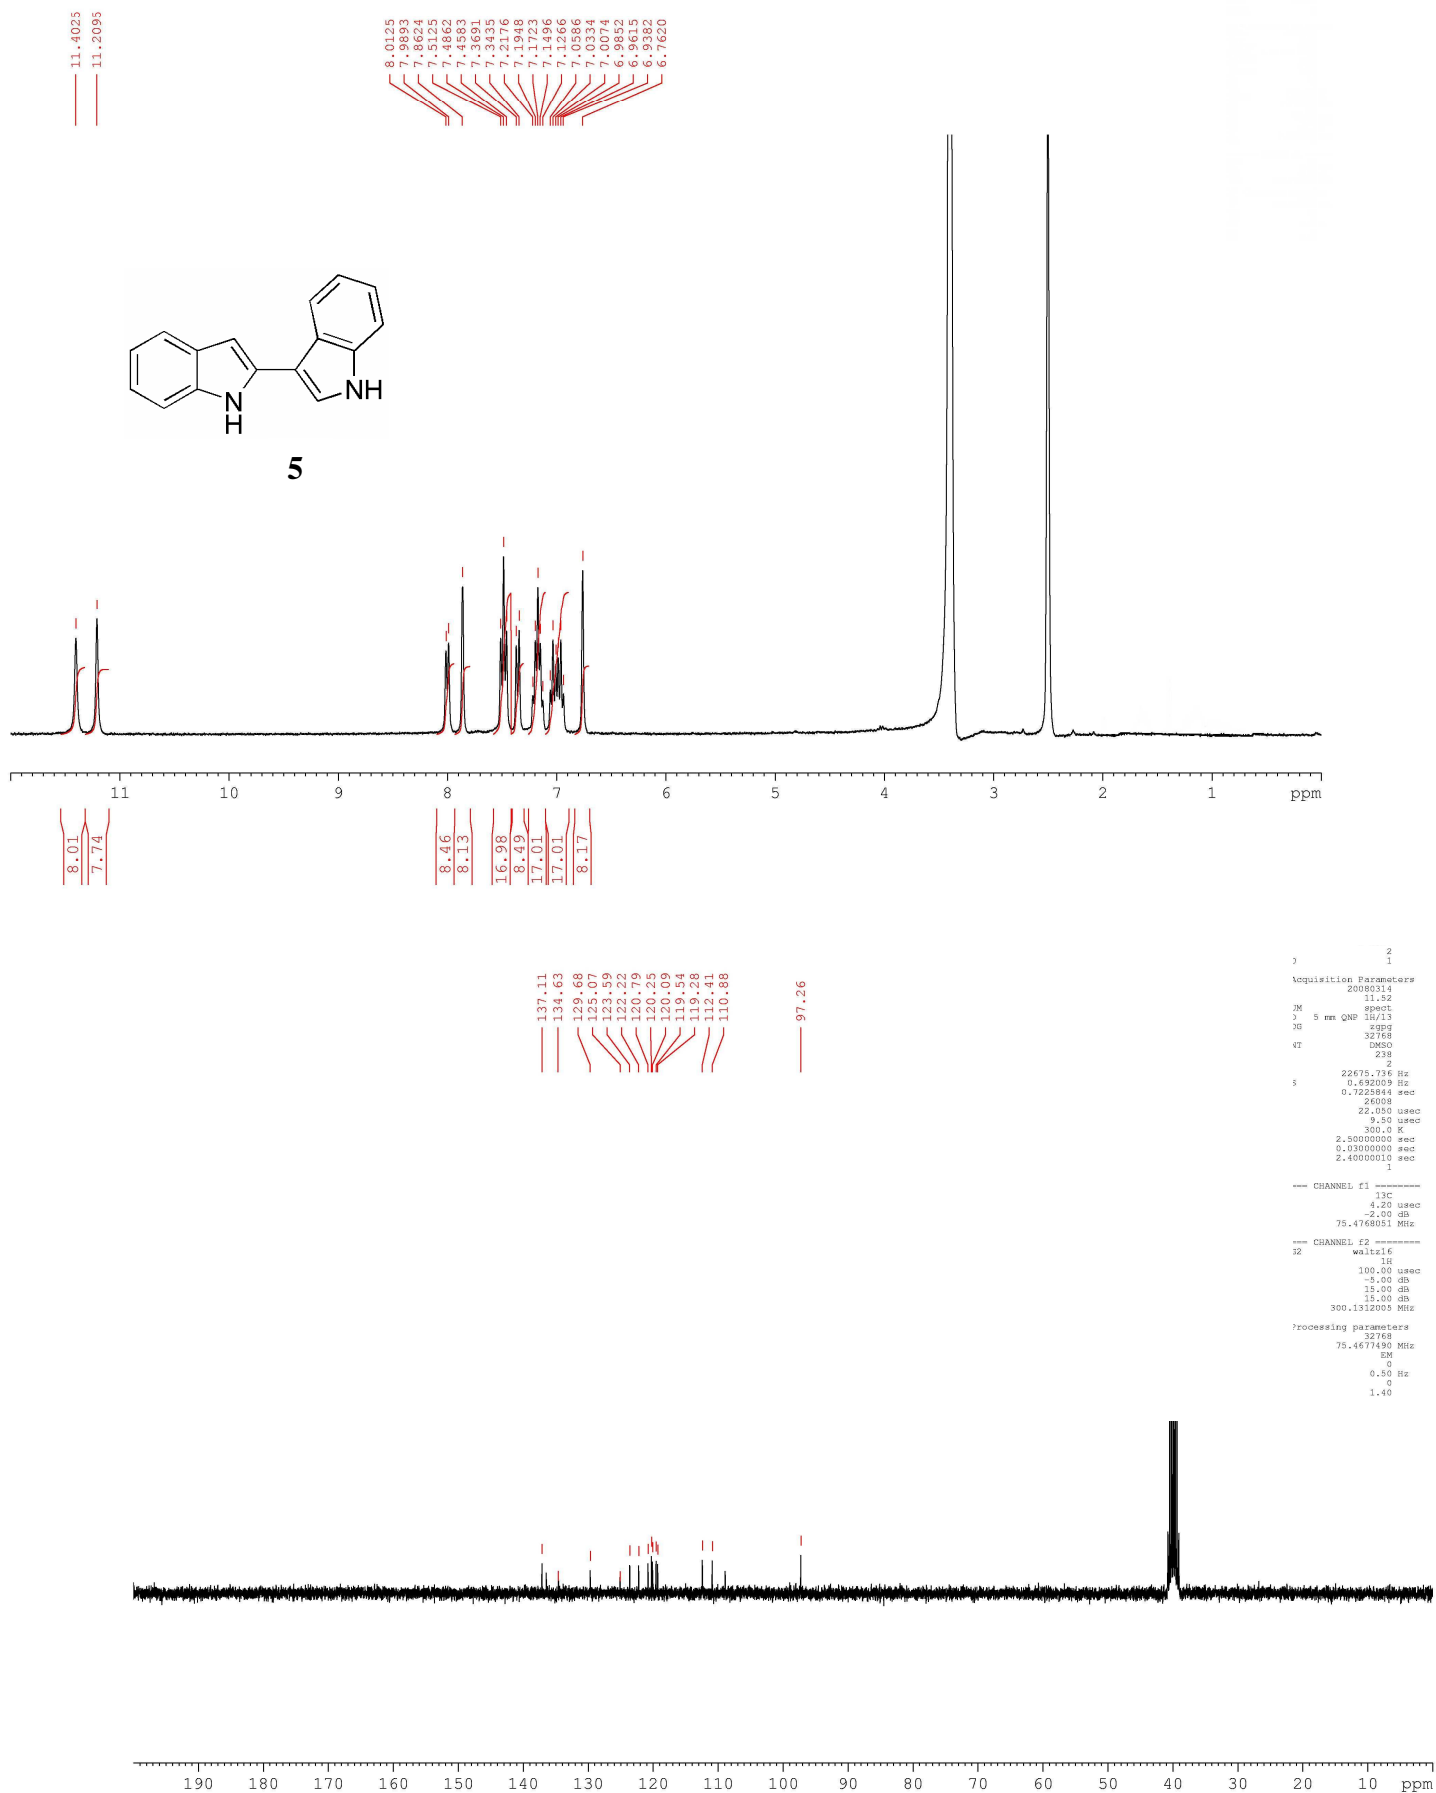

### $^1\text{H}$ and $^{13}\text{C}$ NMR spectra of compound **12**

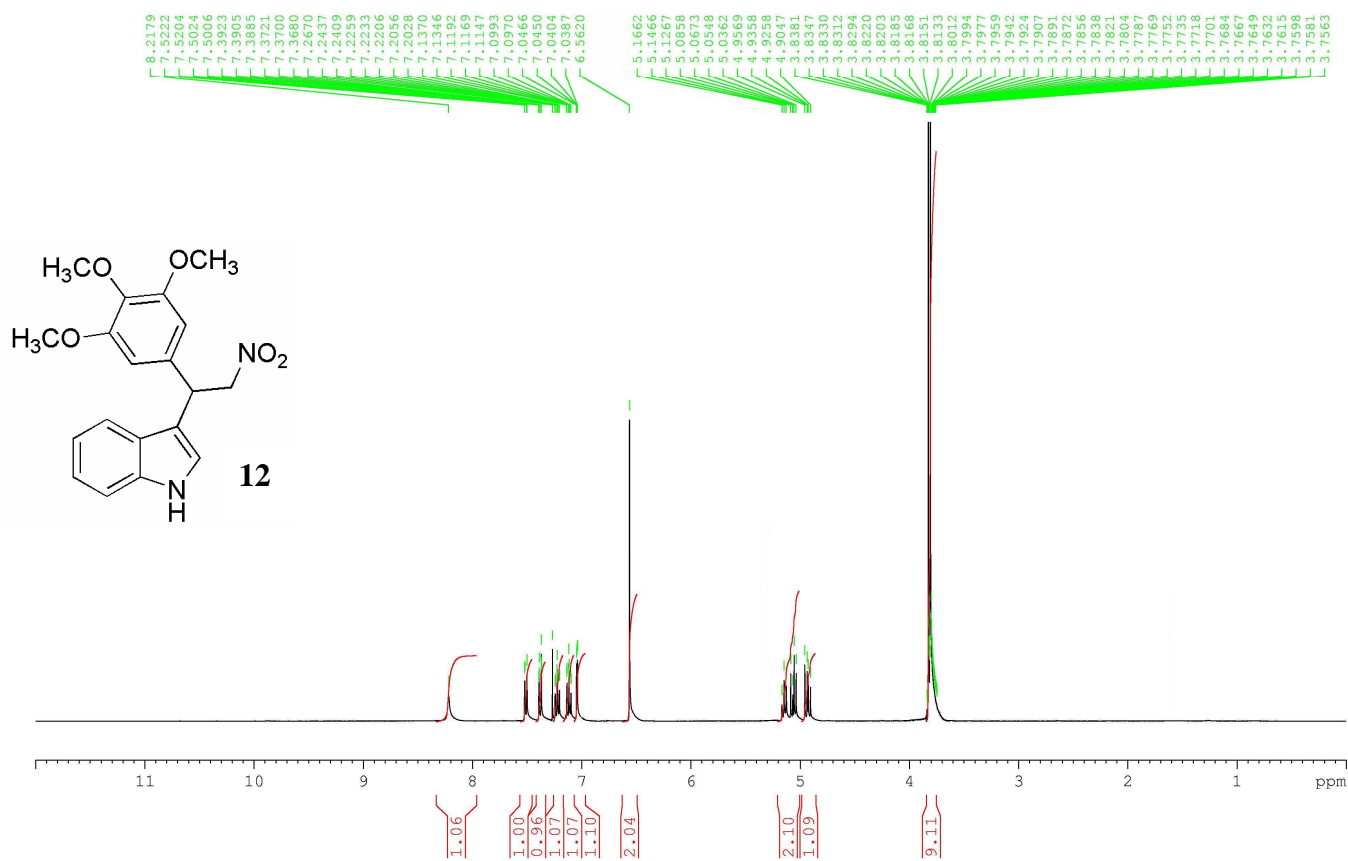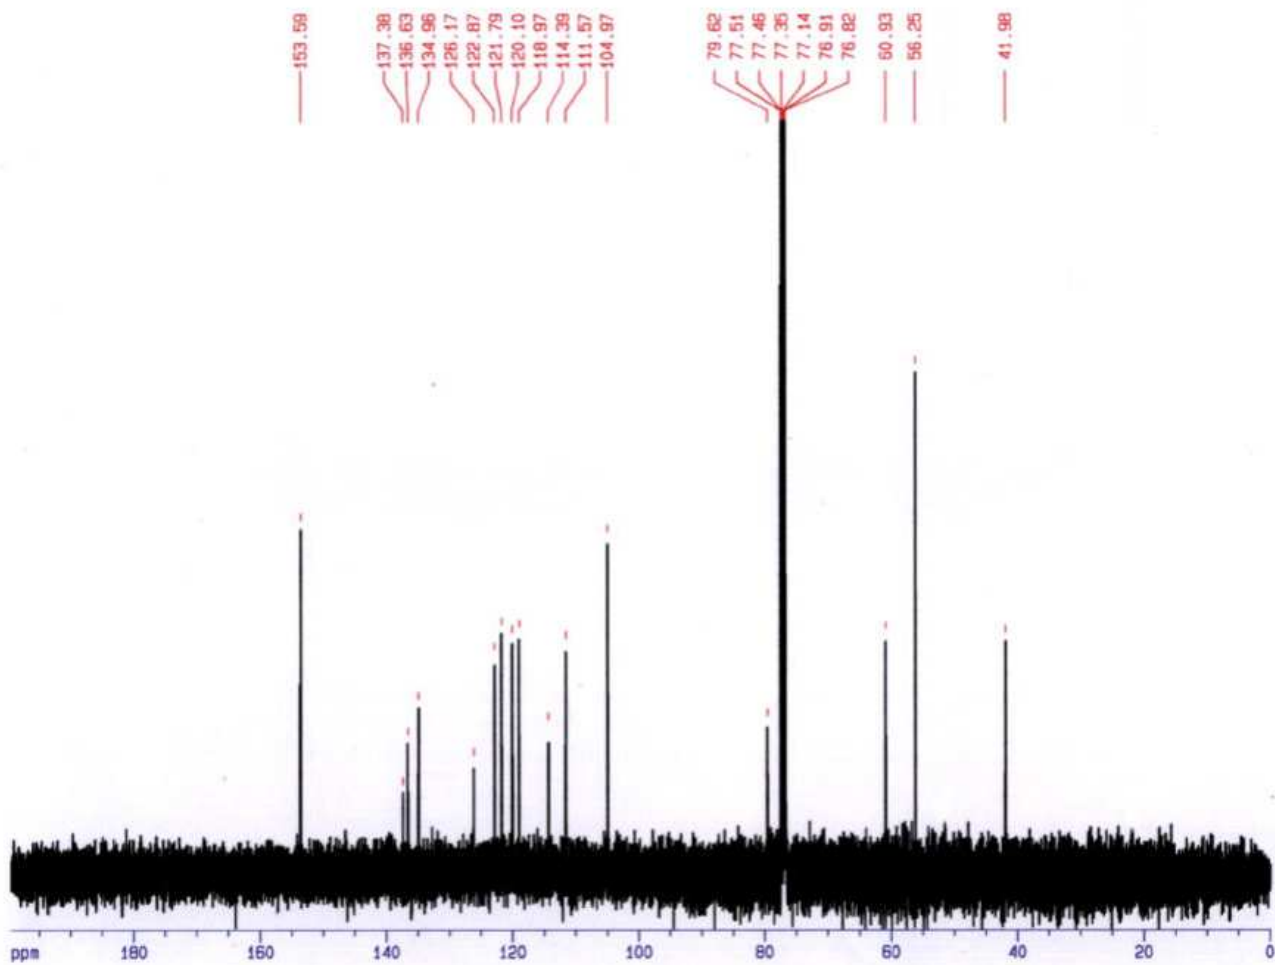



### HMQC and HMBC spectra of compound **12**

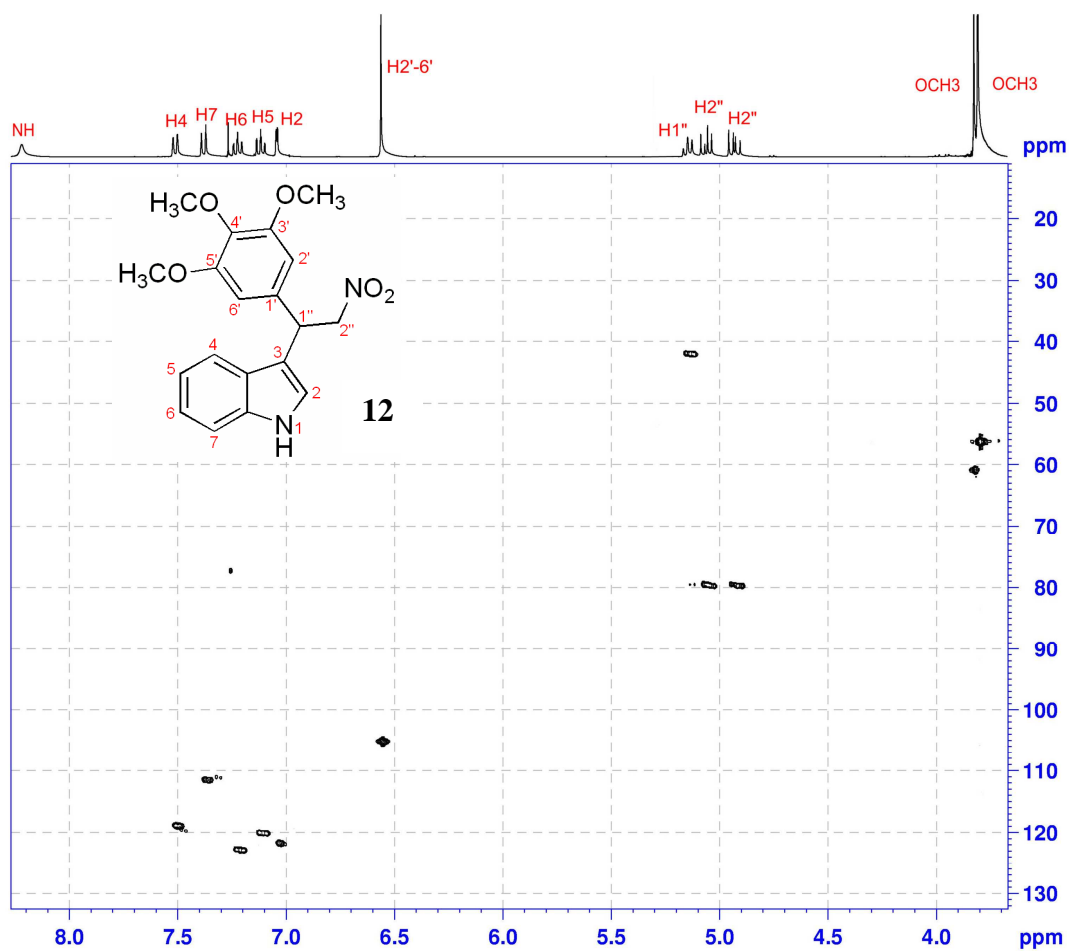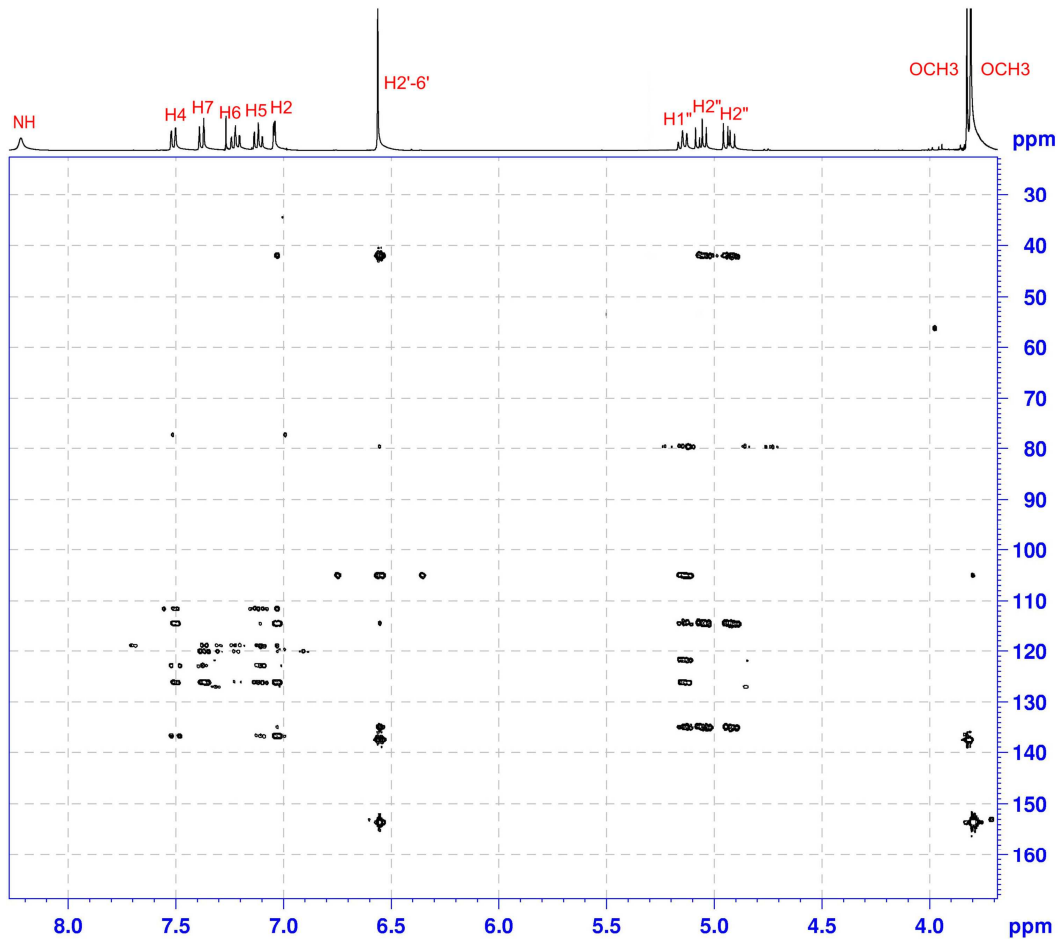

### $^1\text{H}$ and $^{13}\text{C}$ NMR spectra of compound **7**

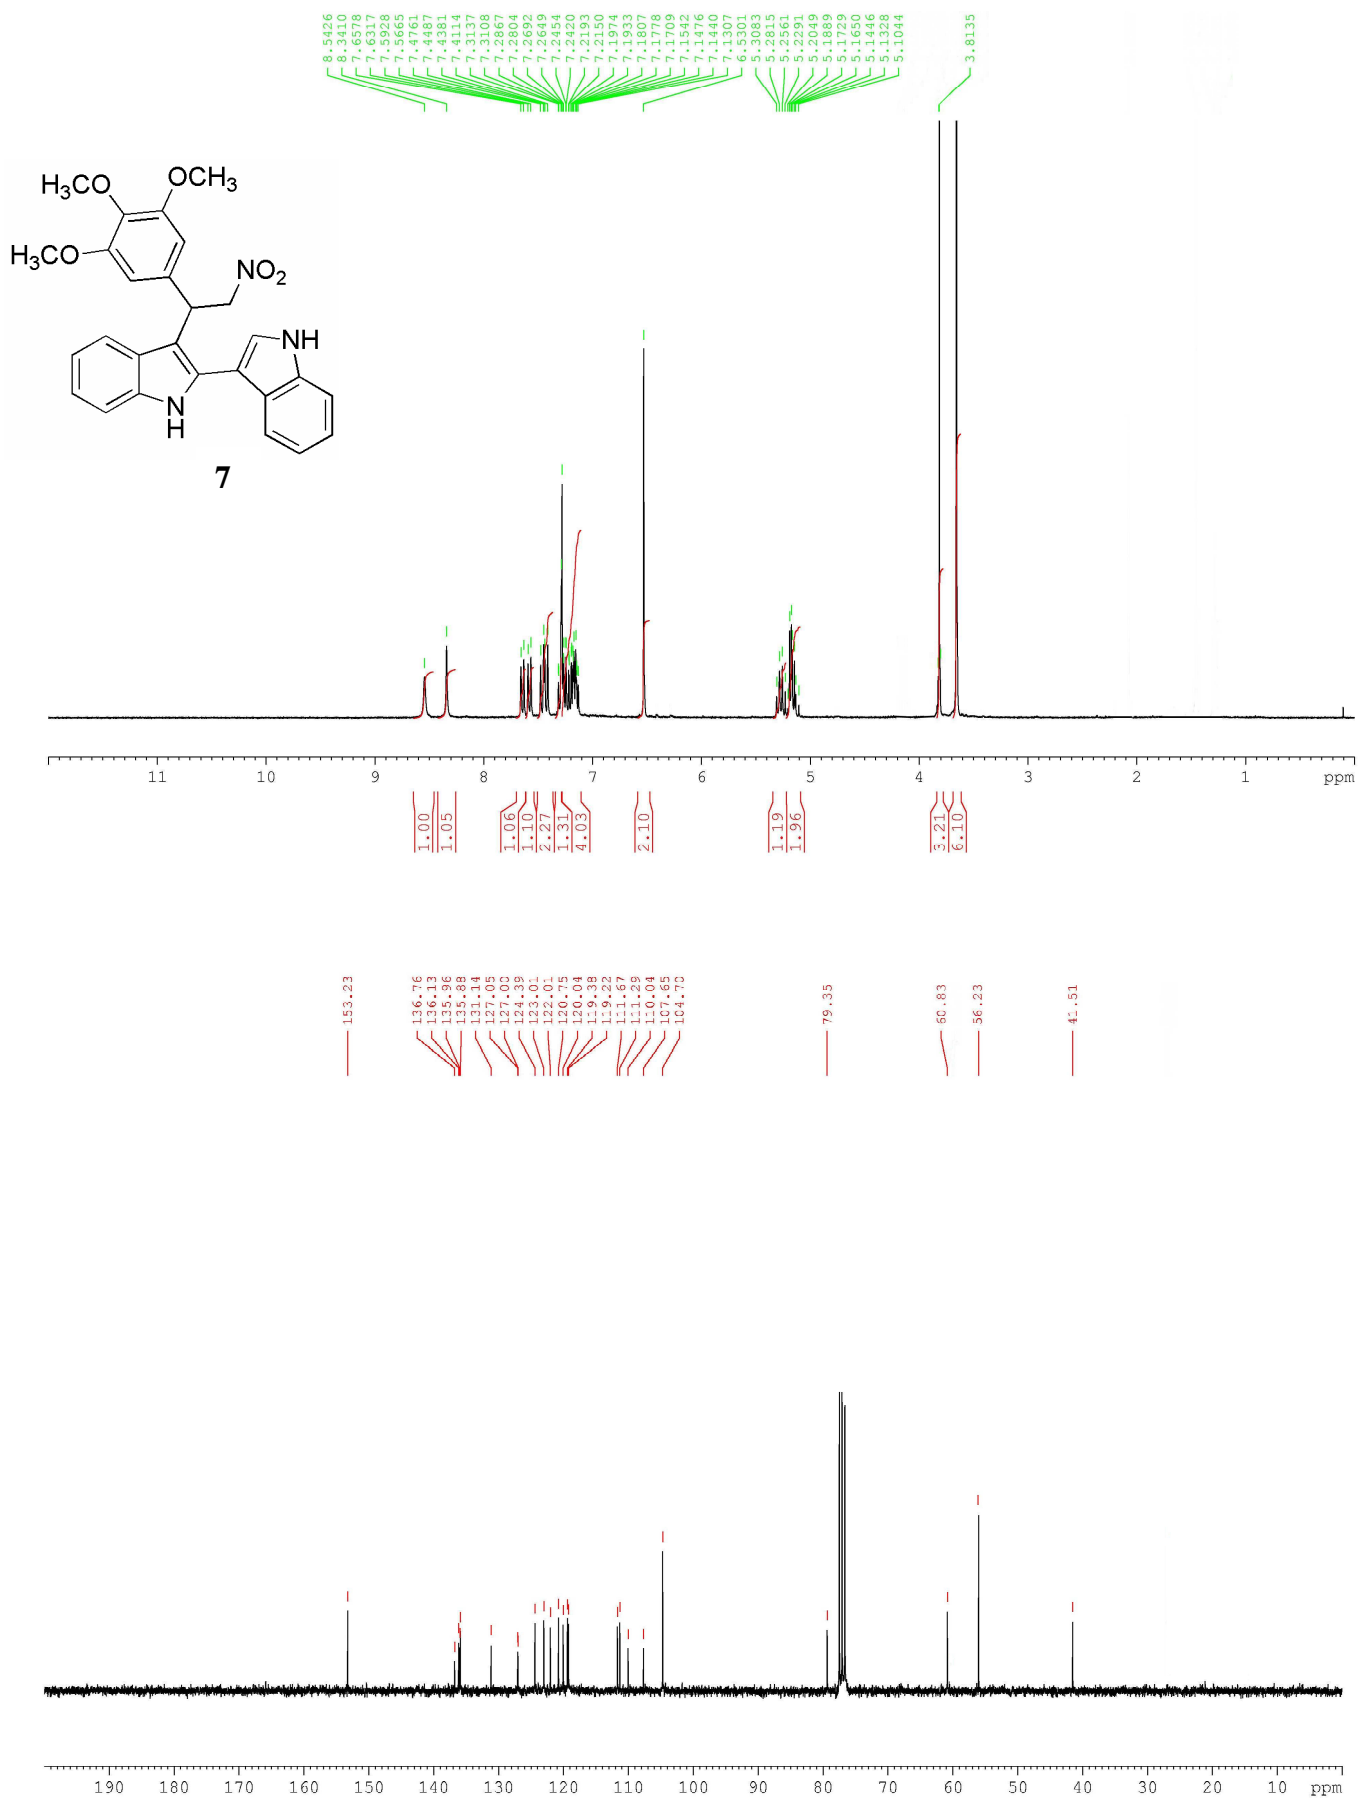



### <sup>1</sup>H and <sup>13</sup>C NMR spectra of 2-Amino-4,5-dimethoxybenzoic acid

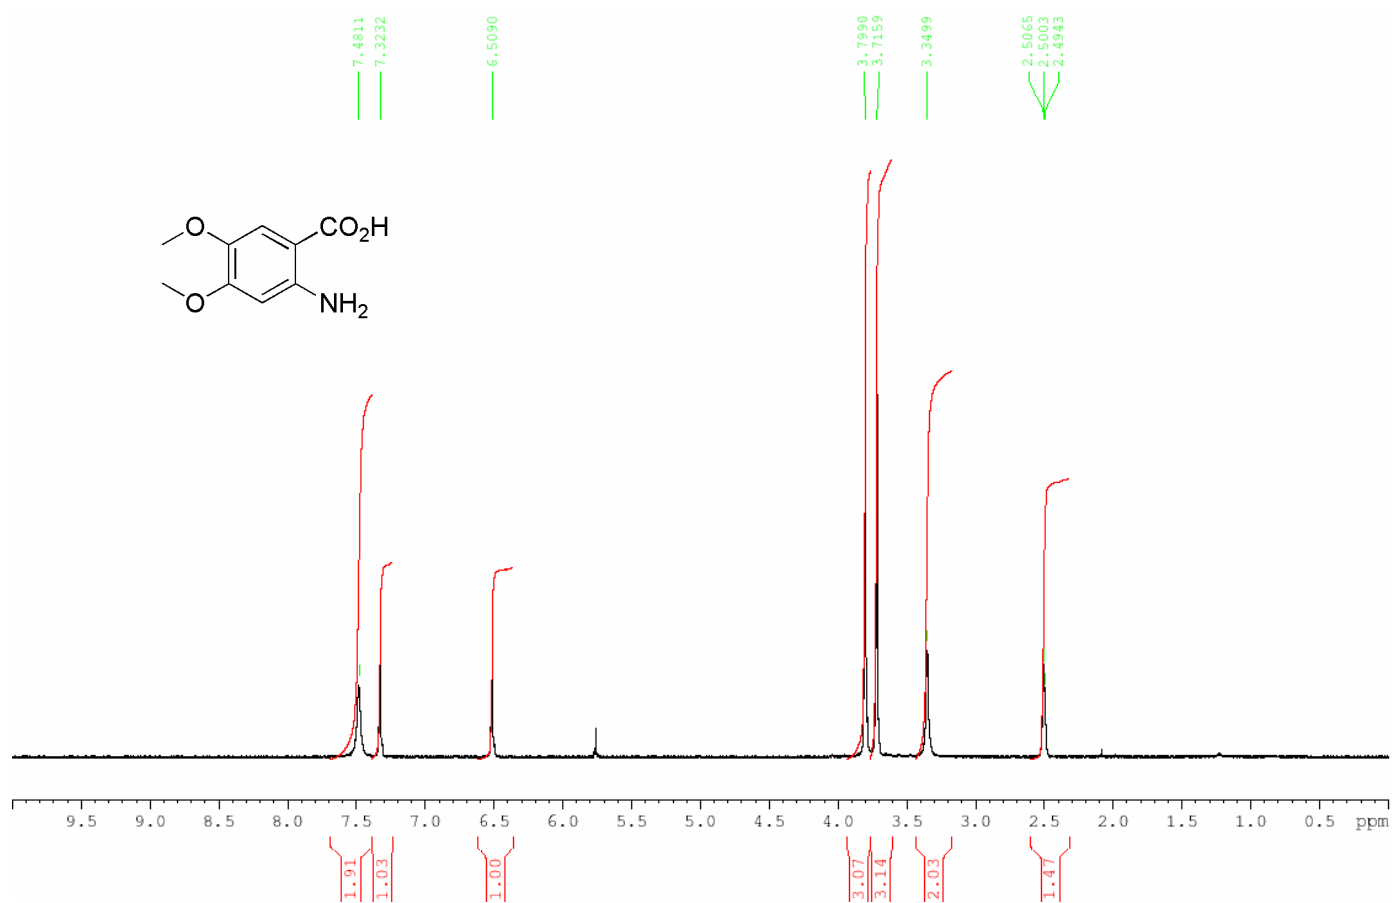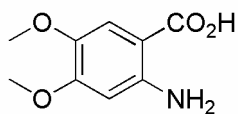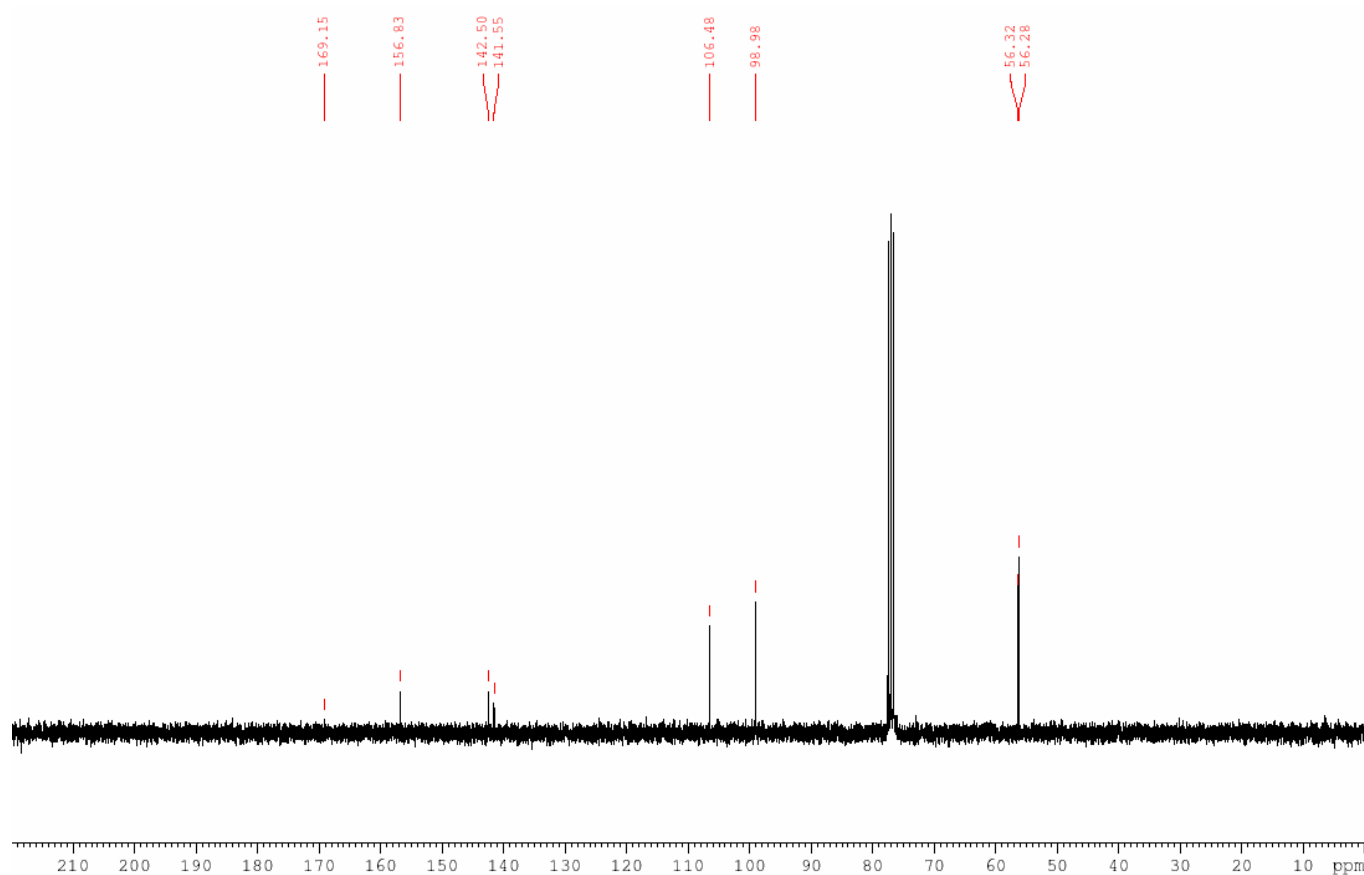

Supplement: c1ob06108a.pdf [file c1ob06108a.pdf]
